# Supplementary material for: Integrated Analysis of Weighted Gene Coexpression Network Analysis Identifying Six Genes as Novel Biomarkers for Alzheimer's Disease
Source: Oxid Med Cell Longev. 2021 Jul 26;2021:9918498. doi: 10.1155/2021/9918498 (PMC8339876; doi:10.1155/2021/9918498)
Supplement: Supplementary 1 — Supplementary Table 1: the results of biological processes of GSEA. [file 9918498.f1.txt]

Table S1 The results of biological processes
NAME	GS<br> follow link to MSigDB	GS DETAILS	SIZE	ES	NES	NOM p-val	FDR q-val	FWER p-val	RANK AT MAX	LEADING EDGE
GO_ENTERIC_NERVOUS_SYSTEM_DEVELOPMENT	GO_ENTERIC_NERVOUS_SYSTEM_DEVELOPMENT	Details ...	15	0.7614732	2.0873406	0	0.019704193	0.029	2572	tags=60%, list=12%, signal=68%
GO_NOTOCHORD_DEVELOPMENT	GO_NOTOCHORD_DEVELOPMENT	Details ...	18	0.7248879	1.9842553	0.002136752	0.03357864	0.112	2612	tags=61%, list=12%, signal=69%
GO_VASCULAR_WOUND_HEALING	GO_VASCULAR_WOUND_HEALING	Details ...	18	0.76006144	1.9862449	0	0.04764683	0.106	3926	tags=72%, list=18%, signal=88%
GO_REGULATION_OF_BICELLULAR_TIGHT_JUNCTION_ASSEMBLY	GO_REGULATION_OF_BICELLULAR_TIGHT_JUNCTION_ASSEMBLY	Details ...	22	0.6705718	1.9359782	0.004246285	0.057051633	0.221	3395	tags=55%, list=16%, signal=65%
GO_HIPPO_SIGNALING	GO_HIPPO_SIGNALING	Details ...	41	0.6006041	1.8527081	0.00631579	0.11120357	0.425	2585	tags=51%, list=12%, signal=58%
GO_PRI_MIRNA_TRANSCRIPTION_BY_RNA_POLYMERASE_II	GO_PRI_MIRNA_TRANSCRIPTION_BY_RNA_POLYMERASE_II	Details ...	52	0.5485831	1.8131778	0.012269938	0.12112545	0.534	2470	tags=46%, list=11%, signal=52%
GO_URETER_DEVELOPMENT	GO_URETER_DEVELOPMENT	Details ...	18	0.702039	1.837747	0	0.12150278	0.467	3744	tags=56%, list=17%, signal=67%
GO_MESODERMAL_CELL_DIFFERENTIATION	GO_MESODERMAL_CELL_DIFFERENTIATION	Details ...	31	0.6633929	1.869414	0.002114165	0.12334571	0.384	2828	tags=55%, list=13%, signal=63%
GO_HEAD_MORPHOGENESIS	GO_HEAD_MORPHOGENESIS	Details ...	34	0.610946	1.8267714	0.002074689	0.12523797	0.496	2245	tags=47%, list=10%, signal=52%
GO_EMBRYONIC_DIGESTIVE_TRACT_DEVELOPMENT	GO_EMBRYONIC_DIGESTIVE_TRACT_DEVELOPMENT	Details ...	34	0.6103087	1.8539635	0	0.1281766	0.421	2542	tags=41%, list=12%, signal=47%
GO_APOPTOTIC_PROCESS_INVOLVED_IN_MORPHOGENESIS	GO_APOPTOTIC_PROCESS_INVOLVED_IN_MORPHOGENESIS	Details ...	25	0.67953426	1.8135622	0.006329114	0.13272952	0.533	2243	tags=44%, list=10%, signal=49%
GO_REGULATION_OF_ENDOTHELIAL_CELL_DIFFERENTIATION	GO_REGULATION_OF_ENDOTHELIAL_CELL_DIFFERENTIATION	Details ...	35	0.5880459	1.7759655	0.016701462	0.1418137	0.609	1227	tags=34%, list=6%, signal=36%
GO_CELL_DIFFERENTIATION_INVOLVED_IN_KIDNEY_DEVELOPMENT	GO_CELL_DIFFERENTIATION_INVOLVED_IN_KIDNEY_DEVELOPMENT	Details ...	57	0.53733623	1.75301	0.0186722	0.14828199	0.64	1942	tags=35%, list=9%, signal=38%
GO_RENAL_SYSTEM_VASCULATURE_DEVELOPMENT	GO_RENAL_SYSTEM_VASCULATURE_DEVELOPMENT	Details ...	27	0.63795197	1.7778982	0.016842104	0.14833538	0.607	1873	tags=52%, list=9%, signal=57%
GO_ENDOCARDIAL_CUSHION_MORPHOGENESIS	GO_ENDOCARDIAL_CUSHION_MORPHOGENESIS	Details ...	35	0.5877075	1.7565006	0.008333334	0.14984225	0.635	2440	tags=46%, list=11%, signal=51%
GO_GLOMERULUS_DEVELOPMENT	GO_GLOMERULUS_DEVELOPMENT	Details ...	63	0.53970534	1.7606076	0.01863354	0.15060876	0.629	1967	tags=44%, list=9%, signal=49%
GO_EMBRYONIC_DIGESTIVE_TRACT_MORPHOGENESIS	GO_EMBRYONIC_DIGESTIVE_TRACT_MORPHOGENESIS		18	0.6487693	1.7429295	0.006237006	0.15244226	0.657	2542	tags=39%, list=12%, signal=44%
GO_DERMATAN_SULFATE_PROTEOGLYCAN_METABOLIC_PROCESS	GO_DERMATAN_SULFATE_PROTEOGLYCAN_METABOLIC_PROCESS	Details ...	16	0.6788796	1.7463324	0.008179959	0.1540794	0.653	2394	tags=44%, list=11%, signal=49%
GO_POSITIVE_REGULATION_OF_ENDOTHELIAL_CELL_DIFFERENTIATION	GO_POSITIVE_REGULATION_OF_ENDOTHELIAL_CELL_DIFFERENTIATION	Details ...	18	0.6535345	1.7629743	0.014403292	0.15550956	0.627	1227	tags=44%, list=6%, signal=47%
GO_SPINAL_CORD_PATTERNING	GO_SPINAL_CORD_PATTERNING	Details ...	23	0.65556157	1.7864271	0.00204918	0.15588364	0.586	1697	tags=43%, list=8%, signal=47%
GO_EPITHELIAL_TO_MESENCHYMAL_TRANSITION_INVOLVED_IN_ENDOCARDIAL_CUSHION_FORMATION	GO_EPITHELIAL_TO_MESENCHYMAL_TRANSITION_INVOLVED_IN_ENDOCARDIAL_CUSHION_FORMATION	Details ...	17	0.6779097	1.7798666	0.010638298	0.15596063	0.601	2440	tags=53%, list=11%, signal=60%
GO_ESTABLISHMENT_OF_ENDOTHELIAL_BARRIER	GO_ESTABLISHMENT_OF_ENDOTHELIAL_BARRIER		45	0.52247083	1.7021813	0.030927835	0.19995825	0.72	1248	tags=33%, list=6%, signal=35%
GO_POSITIVE_REGULATION_OF_BMP_SIGNALING_PATHWAY	GO_POSITIVE_REGULATION_OF_BMP_SIGNALING_PATHWAY		32	0.55849797	1.7088199	0.024948025	0.20015594	0.71	1769	tags=41%, list=8%, signal=44%
GO_NEPHRON_EPITHELIUM_DEVELOPMENT	GO_NEPHRON_EPITHELIUM_DEVELOPMENT		109	0.4714196	1.7158371	0.016161617	0.20072153	0.699	1942	tags=33%, list=9%, signal=36%
GO_VENTRAL_SPINAL_CORD_INTERNEURON_DIFFERENTIATION	GO_VENTRAL_SPINAL_CORD_INTERNEURON_DIFFERENTIATION		16	0.6626187	1.7049513	0.006036217	0.20112868	0.716	1697	tags=50%, list=8%, signal=54%
GO_POSITIVE_REGULATION_OF_CHONDROCYTE_DIFFERENTIATION	GO_POSITIVE_REGULATION_OF_CHONDROCYTE_DIFFERENTIATION		19	0.60965693	1.6937473	0.012448133	0.20407848	0.726	2089	tags=37%, list=10%, signal=41%
GO_AORTA_MORPHOGENESIS	GO_AORTA_MORPHOGENESIS		31	0.5781433	1.6840264	0.020325202	0.20515658	0.73	4763	tags=58%, list=22%, signal=74%
GO_CELLULAR_RESPONSE_TO_ZINC_ION	GO_CELLULAR_RESPONSE_TO_ZINC_ION		21	0.63643277	1.6862109	0.06790123	0.2069086	0.729	795	tags=43%, list=4%, signal=44%
GO_SECONDARY_PALATE_DEVELOPMENT	GO_SECONDARY_PALATE_DEVELOPMENT		23	0.59016556	1.709114	0.014314928	0.20796897	0.71	4500	tags=57%, list=21%, signal=71%
GO_CELL_CELL_ADHESION_MEDIATED_BY_INTEGRIN	GO_CELL_CELL_ADHESION_MEDIATED_BY_INTEGRIN		16	0.61927927	1.6885078	0.012903226	0.20856678	0.728	2255	tags=56%, list=10%, signal=63%
GO_GLOMERULAR_EPITHELIUM_DEVELOPMENT	GO_GLOMERULAR_EPITHELIUM_DEVELOPMENT		23	0.5898161	1.6947241	0.030487806	0.20919792	0.725	1683	tags=43%, list=8%, signal=47%
GO_ENDOCARDIAL_CUSHION_FORMATION	GO_ENDOCARDIAL_CUSHION_FORMATION		24	0.5868369	1.6755989	0.016736401	0.21140645	0.735	2440	tags=50%, list=11%, signal=56%
GO_NEPHRON_DEVELOPMENT	GO_NEPHRON_DEVELOPMENT		141	0.45143494	1.6719564	0.024742268	0.21269402	0.74	1967	tags=35%, list=9%, signal=38%
GO_MESONEPHRIC_TUBULE_MORPHOGENESIS	GO_MESONEPHRIC_TUBULE_MORPHOGENESIS		66	0.48960105	1.6772112	0.022403259	0.2140088	0.733	1942	tags=30%, list=9%, signal=33%
GO_REGULATION_OF_EPITHELIAL_CELL_DIFFERENTIATION	GO_REGULATION_OF_EPITHELIAL_CELL_DIFFERENTIATION		147	0.44868746	1.653343	0.021367522	0.216818	0.764	2052	tags=30%, list=9%, signal=33%
GO_COLLAGEN_FIBRIL_ORGANIZATION	GO_COLLAGEN_FIBRIL_ORGANIZATION		51	0.54255074	1.6505506	0.036960986	0.21796282	0.765	3709	tags=53%, list=17%, signal=64%
GO_CELL_AGGREGATION	GO_CELL_AGGREGATION		21	0.58178693	1.6474129	0.022357723	0.2200389	0.769	3896	tags=57%, list=18%, signal=70%
GO_POSITIVE_REGULATION_OF_TRANSCRIPTION_OF_NOTCH_RECEPTOR_TARGET	GO_POSITIVE_REGULATION_OF_TRANSCRIPTION_OF_NOTCH_RECEPTOR_TARGET		18	0.6342644	1.6661427	0.025751073	0.22068633	0.746	1508	tags=44%, list=7%, signal=48%
GO_VENTRICULAR_CARDIAC_MUSCLE_TISSUE_DEVELOPMENT	GO_VENTRICULAR_CARDIAC_MUSCLE_TISSUE_DEVELOPMENT		54	0.47890785	1.6539239	0.027667984	0.2209443	0.763	3070	tags=44%, list=14%, signal=52%
GO_SMOOTH_MUSCLE_CELL_DIFFERENTIATION	GO_SMOOTH_MUSCLE_CELL_DIFFERENTIATION		54	0.48642406	1.6329758	0.023809524	0.22404575	0.781	1887	tags=35%, list=9%, signal=38%
GO_NEGATIVE_REGULATION_OF_STEM_CELL_DIFFERENTIATION	GO_NEGATIVE_REGULATION_OF_STEM_CELL_DIFFERENTIATION		19	0.63447547	1.6547004	0.042283297	0.22473589	0.762	1077	tags=42%, list=5%, signal=44%
GO_POSITIVE_REGULATION_OF_STEM_CELL_DIFFERENTIATION	GO_POSITIVE_REGULATION_OF_STEM_CELL_DIFFERENTIATION		21	0.5534299	1.6407044	0.03	0.22524677	0.772	644	tags=29%, list=3%, signal=29%
GO_NEPHRON_MORPHOGENESIS	GO_NEPHRON_MORPHOGENESIS		76	0.4658376	1.6385446	0.02258727	0.22525753	0.778	1942	tags=30%, list=9%, signal=33%
GO_REGULATION_OF_EXTRACELLULAR_MATRIX_ORGANIZATION	GO_REGULATION_OF_EXTRACELLULAR_MATRIX_ORGANIZATION		37	0.54854316	1.6426375	0.03742204	0.22579658	0.77	3379	tags=49%, list=16%, signal=58%
GO_LIVER_MORPHOGENESIS	GO_LIVER_MORPHOGENESIS		21	0.5503134	1.6298202	0.03285421	0.22606024	0.781	2667	tags=52%, list=12%, signal=60%
GO_KIDNEY_EPITHELIUM_DEVELOPMENT	GO_KIDNEY_EPITHELIUM_DEVELOPMENT		141	0.43874654	1.6337869	0.03469388	0.22687778	0.781	2006	tags=33%, list=9%, signal=36%
GO_ANGIOGENESIS_INVOLVED_IN_WOUND_HEALING	GO_ANGIOGENESIS_INVOLVED_IN_WOUND_HEALING		27	0.57201225	1.6578999	0.023354564	0.22827256	0.754	3374	tags=52%, list=16%, signal=61%
GO_MESENCHYME_MORPHOGENESIS	GO_MESENCHYME_MORPHOGENESIS		51	0.5242055	1.6554216	0.037113402	0.22873732	0.761	2440	tags=41%, list=11%, signal=46%
GO_GLAND_MORPHOGENESIS	GO_GLAND_MORPHOGENESIS		119	0.46447486	1.6347461	0.027542373	0.2295018	0.78	2717	tags=41%, list=13%, signal=47%
GO_CHONDROCYTE_PROLIFERATION	GO_CHONDROCYTE_PROLIFERATION		15	0.6299207	1.6585653	0.01871102	0.23283075	0.753	2743	tags=47%, list=13%, signal=53%
GO_CARDIAC_MUSCLE_TISSUE_MORPHOGENESIS	GO_CARDIAC_MUSCLE_TISSUE_MORPHOGENESIS		61	0.44998935	1.6199906	0.02952756	0.24000457	0.791	3532	tags=43%, list=16%, signal=51%
GO_REGULATION_OF_EPIDERMAL_CELL_DIFFERENTIATION	GO_REGULATION_OF_EPIDERMAL_CELL_DIFFERENTIATION		58	0.4743575	1.6215677	0.027310925	0.24106903	0.789	2310	tags=33%, list=11%, signal=37%
GO_POSITIVE_REGULATION_OF_VASCULATURE_DEVELOPMENT	GO_POSITIVE_REGULATION_OF_VASCULATURE_DEVELOPMENT		181	0.43889636	1.6154349	0.016949153	0.24623479	0.795	3026	tags=38%, list=14%, signal=43%
