# Supplementary material for: Integrated Analysis of Weighted Gene Coexpression Network Analysis Identifying Six Genes as Novel Biomarkers for Alzheimer's Disease
Source: Oxid Med Cell Longev. 2021 Jul 26;2021:9918498. doi: 10.1155/2021/9918498 (PMC8339876; doi:10.1155/2021/9918498)
Supplement: Supplementary 2 — Supplementary Table 2: the results of GO enrichment analysis. [file 9918498.f2.txt]

Table 2 The results of GO enrichment analysis
	ID	Description	GeneRatio	BgRatio	pvalue	p.adjust	qvalue	geneID	Count
BP	GO:0032543	mitochondrial translation	37/855	135/18670	3.79E-19	1.83E-15	1.68E-15	C1QBP/CHCHD1/COA3/GFM2/IARS2/MRPL1/MRPL12/MRPL13/MRPL14/MRPL15/MRPL16/MRPL17/MRPL18/MRPL21/MRPL22/MRPL27/MRPL36/MRPL37/MRPL39/MRPL40/MRPL46/MRPL47/MRPS11/MRPS12/MRPS17/MRPS18C/MRPS23/MRPS28/MRPS34/MRPS7/MRPS9/NDUFA7/NOA1/OXA1L/RARS2/RMND1/TRUB2	37
	GO:0140053	mitochondrial gene expression	40/855	162/18670	8.28E-19	2.00E-15	1.83E-15	C1QBP/CHCHD1/COA3/ELAC2/FASTKD5/GFM2/IARS2/MRPL1/MRPL12/MRPL13/MRPL14/MRPL15/MRPL16/MRPL17/MRPL18/MRPL21/MRPL22/MRPL27/MRPL36/MRPL37/MRPL39/MRPL40/MRPL46/MRPL47/MRPS11/MRPS12/MRPS17/MRPS18C/MRPS23/MRPS28/MRPS34/MRPS7/MRPS9/NDUFA7/NOA1/OXA1L/RARS2/RMND1/SUPV3L1/TRUB2	40
	GO:0070126	mitochondrial translational termination	29/855	89/18670	1.50E-17	2.41E-14	2.21E-14	CHCHD1/GFM2/MRPL1/MRPL12/MRPL13/MRPL14/MRPL15/MRPL16/MRPL17/MRPL18/MRPL21/MRPL22/MRPL27/MRPL36/MRPL37/MRPL39/MRPL40/MRPL46/MRPL47/MRPS11/MRPS12/MRPS17/MRPS18C/MRPS23/MRPS28/MRPS34/MRPS7/MRPS9/OXA1L	29
	GO:0070125	mitochondrial translational elongation	28/855	88/18670	1.10E-16	1.33E-13	1.22E-13	CHCHD1/MRPL1/MRPL12/MRPL13/MRPL14/MRPL15/MRPL16/MRPL17/MRPL18/MRPL21/MRPL22/MRPL27/MRPL36/MRPL37/MRPL39/MRPL40/MRPL46/MRPL47/MRPS11/MRPS12/MRPS17/MRPS18C/MRPS23/MRPS28/MRPS34/MRPS7/MRPS9/OXA1L	28
	GO:0031145	anaphase-promoting complex-dependent catabolic process	26/855	81/18670	1.07E-15	1.04E-12	9.52E-13	CDC20/CDK1/CUL3/PSMA1/PSMA3/PSMA7/PSMA8/PSMB2/PSMB4/PSMB5/PSMB6/PSMB7/PSMC1/PSMC2/PSMC3/PSMC5/PSMD1/PSMD10/PSMD11/PSMD12/PSMD4/PSMD6/PSMD8/PSME1/UBC/UBE2S	26
	GO:0006415	translational termination	29/855	104/18670	1.62E-15	1.31E-12	1.20E-12	CHCHD1/GFM2/MRPL1/MRPL12/MRPL13/MRPL14/MRPL15/MRPL16/MRPL17/MRPL18/MRPL21/MRPL22/MRPL27/MRPL36/MRPL37/MRPL39/MRPL40/MRPL46/MRPL47/MRPS11/MRPS12/MRPS17/MRPS18C/MRPS23/MRPS28/MRPS34/MRPS7/MRPS9/OXA1L	29
	GO:0033108	mitochondrial respiratory chain complex assembly	27/855	96/18670	1.22E-14	8.40E-12	7.70E-12	COA1/COA3/ECSIT/ND6/NDUFA1/NDUFA12/NDUFA2/NDUFA7/NDUFA8/NDUFAB1/NDUFAF1/NDUFAF3/NDUFAF5/NDUFB10/NDUFB4/NDUFB5/NDUFS3/NDUFV2/NDUFV3/OXA1L/PET100/SAMM50/SCO1/SCO2/TMEM126B/TTC19/UQCR10	27
	GO:0061418	regulation of transcription from RNA polymerase II promoter in response to hypoxia	24/855	77/18670	2.86E-14	1.64E-11	1.50E-11	CITED2/PSMA1/PSMA3/PSMA7/PSMA8/PSMB2/PSMB4/PSMB5/PSMB6/PSMB7/PSMC1/PSMC2/PSMC3/PSMC5/PSMD1/PSMD10/PSMD11/PSMD12/PSMD4/PSMD6/PSMD8/PSME1/RBX1/UBC	24
	GO:0010389	regulation of G2/M transition of mitotic cell cycle	38/855	196/18670	3.05E-14	1.64E-11	1.50E-11	CDK1/CEP192/CEP72/CETN2/CUL1/DCTN2/DCTN3/DYNC1H1/DYNLL1/HAUS1/NAE1/PAFAH1B1/PHOX2B/PSMA1/PSMA3/PSMA7/PSMA8/PSMB2/PSMB4/PSMB5/PSMB6/PSMB7/PSMC1/PSMC2/PSMC3/PSMC5/PSMD1/PSMD10/PSMD11/PSMD12/PSMD4/PSMD6/PSMD8/PSME1/RAB11A/RAD51C/RBX1/RINT1	38
	GO:0010972	negative regulation of G2/M transition of mitotic cell cycle	26/855	93/18670	4.42E-14	2.14E-11	1.96E-11	CDK1/CUL1/NAE1/PSMA1/PSMA3/PSMA7/PSMA8/PSMB2/PSMB4/PSMB5/PSMB6/PSMB7/PSMC1/PSMC2/PSMC3/PSMC5/PSMD1/PSMD10/PSMD11/PSMD12/PSMD4/PSMD6/PSMD8/PSME1/RBX1/RINT1	26
	GO:0031146	SCF-dependent proteasomal ubiquitin-dependent protein catabolic process	26/855	95/18670	7.70E-14	3.39E-11	3.10E-11	CUL1/CUL3/FBXO17/FBXO4/PSMA1/PSMA3/PSMA7/PSMA8/PSMB2/PSMB4/PSMB5/PSMB6/PSMB7/PSMC1/PSMC2/PSMC3/PSMC5/PSMD1/PSMD10/PSMD11/PSMD12/PSMD4/PSMD6/PSMD8/PSME1/RBX1	26
	GO:0006521	regulation of cellular amino acid metabolic process	21/855	62/18670	1.84E-13	7.40E-11	6.78E-11	PSMA1/PSMA3/PSMA7/PSMA8/PSMB2/PSMB4/PSMB5/PSMB6/PSMB7/PSMC1/PSMC2/PSMC3/PSMC5/PSMD1/PSMD10/PSMD11/PSMD12/PSMD4/PSMD6/PSMD8/PSME1	21
	GO:1902749	regulation of cell cycle G2/M phase transition	38/855	213/18670	4.73E-13	1.76E-10	1.61E-10	CDK1/CEP192/CEP72/CETN2/CUL1/DCTN2/DCTN3/DYNC1H1/DYNLL1/HAUS1/NAE1/PAFAH1B1/PHOX2B/PSMA1/PSMA3/PSMA7/PSMA8/PSMB2/PSMB4/PSMB5/PSMB6/PSMB7/PSMC1/PSMC2/PSMC3/PSMC5/PSMD1/PSMD10/PSMD11/PSMD12/PSMD4/PSMD6/PSMD8/PSME1/RAB11A/RAD51C/RBX1/RINT1	38
	GO:1902036	regulation of hematopoietic stem cell differentiation	22/855	72/18670	5.38E-13	1.86E-10	1.70E-10	METTL3/PSMA1/PSMA3/PSMA7/PSMA8/PSMB2/PSMB4/PSMB5/PSMB6/PSMB7/PSMC1/PSMC2/PSMC3/PSMC5/PSMD1/PSMD10/PSMD11/PSMD12/PSMD4/PSMD6/PSMD8/PSME1	22
	GO:0000086	G2/M transition of mitotic cell cycle	41/855	247/18670	6.74E-13	2.17E-10	1.99E-10	CDK1/CDK7/CEP192/CEP72/CETN2/CUL1/DCTN2/DCTN3/DYNC1H1/DYNLL1/HAUS1/MNAT1/NAE1/OPTN/PAFAH1B1/PHOX2B/PSMA1/PSMA3/PSMA7/PSMA8/PSMB2/PSMB4/PSMB5/PSMB6/PSMB7/PSMC1/PSMC2/PSMC3/PSMC5/PSMD1/PSMD10/PSMD11/PSMD12/PSMD4/PSMD6/PSMD8/PSME1/RAB11A/RAD51C/RBX1/RINT1	41
	GO:1902750	negative regulation of cell cycle G2/M phase transition	26/855	105/18670	9.96E-13	3.01E-10	2.76E-10	CDK1/CUL1/NAE1/PSMA1/PSMA3/PSMA7/PSMA8/PSMB2/PSMB4/PSMB5/PSMB6/PSMB7/PSMC1/PSMC2/PSMC3/PSMC5/PSMD1/PSMD10/PSMD11/PSMD12/PSMD4/PSMD6/PSMD8/PSME1/RBX1/RINT1	26
	GO:0070498	interleukin-1-mediated signaling pathway	25/855	100/18670	2.16E-12	6.15E-10	5.63E-10	CUL1/PSMA1/PSMA3/PSMA7/PSMA8/PSMB2/PSMB4/PSMB5/PSMB6/PSMB7/PSMC1/PSMC2/PSMC3/PSMC5/PSMD1/PSMD10/PSMD11/PSMD12/PSMD4/PSMD6/PSMD8/PSME1/RBX1/UBC/UBE2N	25
	GO:1901532	regulation of hematopoietic progenitor cell differentiation	23/855	85/18670	2.75E-12	7.38E-10	6.76E-10	METTL3/NUDT21/PSMA1/PSMA3/PSMA7/PSMA8/PSMB2/PSMB4/PSMB5/PSMB6/PSMB7/PSMC1/PSMC2/PSMC3/PSMC5/PSMD1/PSMD10/PSMD11/PSMD12/PSMD4/PSMD6/PSMD8/PSME1	23
	GO:0010257	NADH dehydrogenase complex assembly	20/855	64/18670	3.84E-12	9.29E-10	8.51E-10	COA1/ECSIT/ND6/NDUFA1/NDUFA12/NDUFA2/NDUFA7/NDUFA8/NDUFAB1/NDUFAF1/NDUFAF3/NDUFAF5/NDUFB10/NDUFB4/NDUFB5/NDUFS3/NDUFV2/NDUFV3/OXA1L/TMEM126B	20
	GO:0032981	mitochondrial respiratory chain complex I assembly	20/855	64/18670	3.84E-12	9.29E-10	8.51E-10	COA1/ECSIT/ND6/NDUFA1/NDUFA12/NDUFA2/NDUFA7/NDUFA8/NDUFAB1/NDUFAF1/NDUFAF3/NDUFAF5/NDUFB10/NDUFB4/NDUFB5/NDUFS3/NDUFV2/NDUFV3/OXA1L/TMEM126B	20
	GO:0044839	cell cycle G2/M phase transition	41/855	266/18670	7.99E-12	1.84E-09	1.68E-09	CDK1/CDK7/CEP192/CEP72/CETN2/CUL1/DCTN2/DCTN3/DYNC1H1/DYNLL1/HAUS1/MNAT1/NAE1/OPTN/PAFAH1B1/PHOX2B/PSMA1/PSMA3/PSMA7/PSMA8/PSMB2/PSMB4/PSMB5/PSMB6/PSMB7/PSMC1/PSMC2/PSMC3/PSMC5/PSMD1/PSMD10/PSMD11/PSMD12/PSMD4/PSMD6/PSMD8/PSME1/RAB11A/RAD51C/RBX1/RINT1	41
	GO:0006414	translational elongation	28/855	133/18670	9.47E-12	2.08E-09	1.91E-09	CHCHD1/MRPL1/MRPL12/MRPL13/MRPL14/MRPL15/MRPL16/MRPL17/MRPL18/MRPL21/MRPL22/MRPL27/MRPL36/MRPL37/MRPL39/MRPL40/MRPL46/MRPL47/MRPS11/MRPS12/MRPS17/MRPS18C/MRPS23/MRPS28/MRPS34/MRPS7/MRPS9/OXA1L	28
	GO:0009123	nucleoside monophosphate metabolic process	50/855	375/18670	1.05E-11	2.22E-09	2.03E-09	AAAS/ADK/ADSL/AK6/ATIC/ATP6V1B2/BPGM/CDADC1/CDK1/COX5B/COX6B1/DLD/DNPH1/EIF6/ENO2/GMPR2/IMPDH2/LDHA/MAGI3/MSH2/ND6/NDUFA1/NDUFA12/NDUFA2/NDUFA4/NDUFA7/NDUFA8/NDUFAB1/NDUFAF1/NDUFB10/NDUFB4/NDUFB5/NDUFS3/NDUFV2/NDUFV3/NUDT9/NUP155/NUP50/NUP85/PARP1/PFKM/PGK1/PNKP/PRKAG1/PRPS1/STOML2/UPRT/UQCR10/UQCRC2/UQCRFS1	50
	GO:0045333	cellular respiration	34/855	193/18670	1.16E-11	2.30E-09	2.11E-09	ADSL/CDK1/COX5B/COX6B1/DLD/ETFB/FASTKD5/FH/IDH3A/IDH3B/MDH1/MDH2/MTFR1L/ND6/NDUFA1/NDUFA12/NDUFA2/NDUFA4/NDUFA7/NDUFA8/NDUFAB1/NDUFAF1/NDUFB10/NDUFB4/NDUFB5/NDUFS3/NDUFV2/NDUFV3/NOA1/OXA1L/SDHB/UQCR10/UQCRC2/UQCRFS1	34
	GO:0002479	antigen processing and presentation of exogenous peptide antigen via MHC class I, TAP-dependent	21/855	75/18670	1.19E-11	2.30E-09	2.11E-09	PSMA1/PSMA3/PSMA7/PSMA8/PSMB2/PSMB4/PSMB5/PSMB6/PSMB7/PSMC1/PSMC2/PSMC3/PSMC5/PSMD1/PSMD10/PSMD11/PSMD12/PSMD4/PSMD6/PSMD8/PSME1	21
	GO:0060218	hematopoietic stem cell differentiation	22/855	83/18670	1.29E-11	2.39E-09	2.19E-09	METTL3/PSMA1/PSMA3/PSMA7/PSMA8/PSMB2/PSMB4/PSMB5/PSMB6/PSMB7/PSMC1/PSMC2/PSMC3/PSMC5/PSMD1/PSMD10/PSMD11/PSMD12/PSMD4/PSMD6/PSMD8/PSME1	22
	GO:0042590	antigen processing and presentation of exogenous peptide antigen via MHC class I	21/855	79/18670	3.54E-11	6.35E-09	5.81E-09	PSMA1/PSMA3/PSMA7/PSMA8/PSMB2/PSMB4/PSMB5/PSMB6/PSMB7/PSMC1/PSMC2/PSMC3/PSMC5/PSMD1/PSMD10/PSMD11/PSMD12/PSMD4/PSMD6/PSMD8/PSME1	21
	GO:0009144	purine nucleoside triphosphate metabolic process	46/855	342/18670	5.32E-11	9.20E-09	8.42E-09	AAAS/ADK/ATP6V1B2/BPGM/CDK1/COX5B/COX6B1/DLD/EIF6/ENO2/GPHN/IMPDH2/ITPA/LDHA/MOCS2/MSH2/ND6/NDUFA1/NDUFA12/NDUFA2/NDUFA4/NDUFA7/NDUFA8/NDUFAB1/NDUFAF1/NDUFB10/NDUFB4/NDUFB5/NDUFS3/NDUFV2/NDUFV3/NFS1/NME1/NUDT1/NUP155/NUP50/NUP85/PARP1/PFKM/PGK1/PRKAG1/RAN/STOML2/UQCR10/UQCRC2/UQCRFS1	46
	GO:1901990	regulation of mitotic cell cycle phase transition	54/855	444/18670	5.63E-11	9.38E-09	8.60E-09	APEX1/CDC20/CDCA5/CDK1/CDKN2D/CEP192/CEP72/CETN2/CNOT10/CUL1/CUL3/DCTN2/DCTN3/DYNC1H1/DYNLL1/ERCC3/HAUS1/IK/MAD1L1/MAD2L1BP/NAE1/NSMCE2/PAFAH1B1/PCID2/PHOX2B/PLRG1/PSMA1/PSMA3/PSMA7/PSMA8/PSMB2/PSMB4/PSMB5/PSMB6/PSMB7/PSMC1/PSMC2/PSMC3/PSMC5/PSMD1/PSMD10/PSMD11/PSMD12/PSMD4/PSMD6/PSMD8/PSME1/PSMG2/RAB11A/RAD51C/RBX1/RFWD3/RINT1/RPA2	54
	GO:0033238	regulation of cellular amine metabolic process	21/855	81/18670	5.95E-11	9.59E-09	8.78E-09	PSMA1/PSMA3/PSMA7/PSMA8/PSMB2/PSMB4/PSMB5/PSMB6/PSMB7/PSMC1/PSMC2/PSMC3/PSMC5/PSMD1/PSMD10/PSMD11/PSMD12/PSMD4/PSMD6/PSMD8/PSME1	21
	GO:0043488	regulation of mRNA stability	31/855	177/18670	1.10E-10	1.69E-08	1.55E-08	APEX1/BOLL/CIRBP/EXOSC4/EXOSC5/EXOSC9/METTL3/MTOR/PCID2/PSMA1/PSMA3/PSMA7/PSMA8/PSMB2/PSMB4/PSMB5/PSMB6/PSMB7/PSMC1/PSMC2/PSMC3/PSMC5/PSMD1/PSMD10/PSMD11/PSMD12/PSMD4/PSMD6/PSMD8/PSME1/UBC	31
	GO:0009141	nucleoside triphosphate metabolic process	47/855	362/18670	1.12E-10	1.69E-08	1.55E-08	AAAS/ADK/ATP6V1B2/BPGM/CDK1/COX5B/COX6B1/CTPS1/DLD/EIF6/ENO2/GPHN/IMPDH2/ITPA/LDHA/MOCS2/MSH2/ND6/NDUFA1/NDUFA12/NDUFA2/NDUFA4/NDUFA7/NDUFA8/NDUFAB1/NDUFAF1/NDUFB10/NDUFB4/NDUFB5/NDUFS3/NDUFV2/NDUFV3/NFS1/NME1/NUDT1/NUP155/NUP50/NUP85/PARP1/PFKM/PGK1/PRKAG1/RAN/STOML2/UQCR10/UQCRC2/UQCRFS1	47
	GO:0009199	ribonucleoside triphosphate metabolic process	45/855	341/18670	1.63E-10	2.40E-08	2.20E-08	AAAS/ATP6V1B2/BPGM/CDK1/COX5B/COX6B1/CTPS1/DLD/EIF6/ENO2/GPHN/IMPDH2/ITPA/LDHA/MOCS2/MSH2/ND6/NDUFA1/NDUFA12/NDUFA2/NDUFA4/NDUFA7/NDUFA8/NDUFAB1/NDUFAF1/NDUFB10/NDUFB4/NDUFB5/NDUFS3/NDUFV2/NDUFV3/NFS1/NME1/NUP155/NUP50/NUP85/PARP1/PFKM/PGK1/PRKAG1/RAN/STOML2/UQCR10/UQCRC2/UQCRFS1	45
	GO:0009161	ribonucleoside monophosphate metabolic process	46/855	354/18670	1.72E-10	2.45E-08	2.24E-08	AAAS/ADK/ADSL/ATIC/ATP6V1B2/BPGM/CDK1/COX5B/COX6B1/DLD/EIF6/ENO2/GMPR2/IMPDH2/LDHA/MAGI3/MSH2/ND6/NDUFA1/NDUFA12/NDUFA2/NDUFA4/NDUFA7/NDUFA8/NDUFAB1/NDUFAF1/NDUFB10/NDUFB4/NDUFB5/NDUFS3/NDUFV2/NDUFV3/NUDT9/NUP155/NUP50/NUP85/PARP1/PFKM/PGK1/PRKAG1/PRPS1/STOML2/UPRT/UQCR10/UQCRC2/UQCRFS1	46
	GO:0043618	regulation of transcription from RNA polymerase II promoter in response to stress	25/855	121/18670	1.87E-10	2.59E-08	2.37E-08	CITED2/HSF2/PSMA1/PSMA3/PSMA7/PSMA8/PSMB2/PSMB4/PSMB5/PSMB6/PSMB7/PSMC1/PSMC2/PSMC3/PSMC5/PSMD1/PSMD10/PSMD11/PSMD12/PSMD4/PSMD6/PSMD8/PSME1/RBX1/UBC	25
	GO:0043487	regulation of RNA stability	31/855	183/18670	2.62E-10	3.52E-08	3.22E-08	APEX1/BOLL/CIRBP/EXOSC4/EXOSC5/EXOSC9/METTL3/MTOR/PCID2/PSMA1/PSMA3/PSMA7/PSMA8/PSMB2/PSMB4/PSMB5/PSMB6/PSMB7/PSMC1/PSMC2/PSMC3/PSMC5/PSMD1/PSMD10/PSMD11/PSMD12/PSMD4/PSMD6/PSMD8/PSME1/UBC	31
	GO:0009205	purine ribonucleoside triphosphate metabolic process	44/855	335/18670	3.05E-10	3.99E-08	3.65E-08	AAAS/ATP6V1B2/BPGM/CDK1/COX5B/COX6B1/DLD/EIF6/ENO2/GPHN/IMPDH2/ITPA/LDHA/MOCS2/MSH2/ND6/NDUFA1/NDUFA12/NDUFA2/NDUFA4/NDUFA7/NDUFA8/NDUFAB1/NDUFAF1/NDUFB10/NDUFB4/NDUFB5/NDUFS3/NDUFV2/NDUFV3/NFS1/NME1/NUP155/NUP50/NUP85/PARP1/PFKM/PGK1/PRKAG1/RAN/STOML2/UQCR10/UQCRC2/UQCRFS1	44
	GO:0042775	mitochondrial ATP synthesis coupled electron transport	22/855	97/18670	3.49E-10	4.44E-08	4.07E-08	CDK1/COX5B/COX6B1/DLD/ND6/NDUFA1/NDUFA12/NDUFA2/NDUFA4/NDUFA7/NDUFA8/NDUFAB1/NDUFAF1/NDUFB10/NDUFB4/NDUFB5/NDUFS3/NDUFV2/NDUFV3/UQCR10/UQCRC2/UQCRFS1	22
	GO:0002478	antigen processing and presentation of exogenous peptide antigen	30/855	175/18670	3.77E-10	4.68E-08	4.28E-08	ACTR10/CLTC/DCTN2/DCTN3/DCTN6/DYNC1H1/DYNLL1/KIF11/KIFAP3/PSMA1/PSMA3/PSMA7/PSMA8/PSMB2/PSMB4/PSMB5/PSMB6/PSMB7/PSMC1/PSMC2/PSMC3/PSMC5/PSMD1/PSMD10/PSMD11/PSMD12/PSMD4/PSMD6/PSMD8/PSME1	30
	GO:2000736	regulation of stem cell differentiation	24/855	116/18670	4.20E-10	5.08E-08	4.65E-08	BMP4/METTL3/NUDT21/PSMA1/PSMA3/PSMA7/PSMA8/PSMB2/PSMB4/PSMB5/PSMB6/PSMB7/PSMC1/PSMC2/PSMC3/PSMC5/PSMD1/PSMD10/PSMD11/PSMD12/PSMD4/PSMD6/PSMD8/PSME1	24
	GO:0042773	ATP synthesis coupled electron transport	22/855	98/18670	4.31E-10	5.08E-08	4.66E-08	CDK1/COX5B/COX6B1/DLD/ND6/NDUFA1/NDUFA12/NDUFA2/NDUFA4/NDUFA7/NDUFA8/NDUFAB1/NDUFAF1/NDUFB10/NDUFB4/NDUFB5/NDUFS3/NDUFV2/NDUFV3/UQCR10/UQCRC2/UQCRFS1	22
	GO:0009167	purine ribonucleoside monophosphate metabolic process	44/855	340/18670	4.92E-10	5.67E-08	5.19E-08	AAAS/ADK/ADSL/ATIC/ATP6V1B2/BPGM/CDK1/COX5B/COX6B1/DLD/EIF6/ENO2/GMPR2/IMPDH2/LDHA/MAGI3/MSH2/ND6/NDUFA1/NDUFA12/NDUFA2/NDUFA4/NDUFA7/NDUFA8/NDUFAB1/NDUFAF1/NDUFB10/NDUFB4/NDUFB5/NDUFS3/NDUFV2/NDUFV3/NUDT9/NUP155/NUP50/NUP85/PARP1/PFKM/PGK1/PRKAG1/STOML2/UQCR10/UQCRC2/UQCRFS1	44
	GO:0022904	respiratory electron transport chain	24/855	117/18670	5.06E-10	5.69E-08	5.21E-08	CDK1/COX5B/COX6B1/DLD/ETFB/ND6/NDUFA1/NDUFA12/NDUFA2/NDUFA4/NDUFA7/NDUFA8/NDUFAB1/NDUFAF1/NDUFB10/NDUFB4/NDUFB5/NDUFS3/NDUFV2/NDUFV3/SDHB/UQCR10/UQCRC2/UQCRFS1	24
	GO:0009126	purine nucleoside monophosphate metabolic process	44/855	341/18670	5.41E-10	5.95E-08	5.45E-08	AAAS/ADK/ADSL/ATIC/ATP6V1B2/BPGM/CDK1/COX5B/COX6B1/DLD/EIF6/ENO2/GMPR2/IMPDH2/LDHA/MAGI3/MSH2/ND6/NDUFA1/NDUFA12/NDUFA2/NDUFA4/NDUFA7/NDUFA8/NDUFAB1/NDUFAF1/NDUFB10/NDUFB4/NDUFB5/NDUFS3/NDUFV2/NDUFV3/NUDT9/NUP155/NUP50/NUP85/PARP1/PFKM/PGK1/PRKAG1/STOML2/UQCR10/UQCRC2/UQCRFS1	44
	GO:0043620	regulation of DNA-templated transcription in response to stress	25/855	127/18670	5.54E-10	5.95E-08	5.45E-08	CITED2/HSF2/PSMA1/PSMA3/PSMA7/PSMA8/PSMB2/PSMB4/PSMB5/PSMB6/PSMB7/PSMC1/PSMC2/PSMC3/PSMC5/PSMD1/PSMD10/PSMD11/PSMD12/PSMD4/PSMD6/PSMD8/PSME1/RBX1/UBC	25
	GO:0015980	energy derivation by oxidation of organic compounds	39/855	285/18670	9.54E-10	1.00E-07	9.19E-08	ADSL/CALM1/CDK1/COX5B/COX6B1/DLD/ETFB/FASTKD5/FH/IDH3A/IDH3B/KHK/MDH1/MDH2/MTFR1L/MTOR/ND6/NDUFA1/NDUFA12/NDUFA2/NDUFA4/NDUFA7/NDUFA8/NDUFAB1/NDUFAF1/NDUFB10/NDUFB4/NDUFB5/NDUFS3/NDUFV2/NDUFV3/NOA1/OXA1L/PPP1CA/PYGB/SDHB/UQCR10/UQCRC2/UQCRFS1	39
	GO:0019884	antigen processing and presentation of exogenous antigen	30/855	182/18670	1.00E-09	1.03E-07	9.42E-08	ACTR10/CLTC/DCTN2/DCTN3/DCTN6/DYNC1H1/DYNLL1/KIF11/KIFAP3/PSMA1/PSMA3/PSMA7/PSMA8/PSMB2/PSMB4/PSMB5/PSMB6/PSMB7/PSMC1/PSMC2/PSMC3/PSMC5/PSMD1/PSMD10/PSMD11/PSMD12/PSMD4/PSMD6/PSMD8/PSME1	30
	GO:1901987	regulation of cell cycle phase transition	54/855	480/18670	1.02E-09	1.03E-07	9.42E-08	APEX1/CDC20/CDCA5/CDK1/CDKN2D/CEP192/CEP72/CETN2/CNOT10/CUL1/CUL3/DCTN2/DCTN3/DYNC1H1/DYNLL1/ERCC3/HAUS1/IK/MAD1L1/MAD2L1BP/NAE1/NSMCE2/PAFAH1B1/PCID2/PHOX2B/PLRG1/PSMA1/PSMA3/PSMA7/PSMA8/PSMB2/PSMB4/PSMB5/PSMB6/PSMB7/PSMC1/PSMC2/PSMC3/PSMC5/PSMD1/PSMD10/PSMD11/PSMD12/PSMD4/PSMD6/PSMD8/PSME1/PSMG2/RAB11A/RAD51C/RBX1/RFWD3/RINT1/RPA2	54
	GO:0045930	negative regulation of mitotic cell cycle	43/855	338/18670	1.33E-09	1.31E-07	1.20E-07	BMP4/CDC20/CDK1/CDKN2D/CNOT10/CUL1/DDIAS/E4F1/HRAS/IK/MAD1L1/MAD2L1BP/MSH2/NAE1/PCID2/PSMA1/PSMA3/PSMA7/PSMA8/PSMB2/PSMB4/PSMB5/PSMB6/PSMB7/PSMC1/PSMC2/PSMC3/PSMC5/PSMD1/PSMD10/PSMD11/PSMD12/PSMD4/PSMD6/PSMD8/PSME1/PSMG2/PTTG3P/RBX1/RFWD3/RINT1/RPA2/SETMAR	43
	GO:0002223	stimulatory C-type lectin receptor signaling pathway	23/855	113/18670	1.36E-09	1.32E-07	1.21E-07	CUL1/HRAS/PSMA1/PSMA3/PSMA7/PSMA8/PSMB2/PSMB4/PSMB5/PSMB6/PSMB7/PSMC1/PSMC2/PSMC3/PSMC5/PSMD1/PSMD10/PSMD11/PSMD12/PSMD4/PSMD6/PSMD8/PSME1	23
	GO:0022900	electron transport chain	30/855	186/18670	1.71E-09	1.59E-07	1.46E-07	CDK1/CIAPIN1/COX5B/COX6B1/DHDH/DLD/ETFB/IDH3B/ND6/NDUFA1/NDUFA12/NDUFA2/NDUFA4/NDUFA7/NDUFA8/NDUFAB1/NDUFAF1/NDUFB10/NDUFB4/NDUFB5/NDUFS3/NDUFV2/NDUFV3/POR/PTGES2/SDHB/SH3BGRL3/UQCR10/UQCRC2/UQCRFS1	30
	GO:0001736	establishment of planar polarity	24/855	124/18670	1.75E-09	1.59E-07	1.46E-07	CLTC/DLG3/PAFAH1B1/PSMA1/PSMA3/PSMA7/PSMA8/PSMB2/PSMB4/PSMB5/PSMB6/PSMB7/PSMC1/PSMC2/PSMC3/PSMC5/PSMD1/PSMD10/PSMD11/PSMD12/PSMD4/PSMD6/PSMD8/PSME1	24
	GO:0007164	establishment of tissue polarity	24/855	124/18670	1.75E-09	1.59E-07	1.46E-07	CLTC/DLG3/PAFAH1B1/PSMA1/PSMA3/PSMA7/PSMA8/PSMB2/PSMB4/PSMB5/PSMB6/PSMB7/PSMC1/PSMC2/PSMC3/PSMC5/PSMD1/PSMD10/PSMD11/PSMD12/PSMD4/PSMD6/PSMD8/PSME1	24
	GO:0002474	antigen processing and presentation of peptide antigen via MHC class I	21/855	96/18670	1.78E-09	1.59E-07	1.46E-07	PSMA1/PSMA3/PSMA7/PSMA8/PSMB2/PSMB4/PSMB5/PSMB6/PSMB7/PSMC1/PSMC2/PSMC3/PSMC5/PSMD1/PSMD10/PSMD11/PSMD12/PSMD4/PSMD6/PSMD8/PSME1	21
	GO:0006120	mitochondrial electron transport, NADH to ubiquinone	16/855	55/18670	1.81E-09	1.59E-07	1.46E-07	DLD/ND6/NDUFA1/NDUFA12/NDUFA2/NDUFA4/NDUFA7/NDUFA8/NDUFAB1/NDUFAF1/NDUFB10/NDUFB4/NDUFB5/NDUFS3/NDUFV2/NDUFV3	16
	GO:0061013	regulation of mRNA catabolic process	31/855	199/18670	2.20E-09	1.90E-07	1.74E-07	APEX1/BOLL/CIRBP/EXOSC4/EXOSC5/EXOSC9/METTL3/MTOR/PCID2/PSMA1/PSMA3/PSMA7/PSMA8/PSMB2/PSMB4/PSMB5/PSMB6/PSMB7/PSMC1/PSMC2/PSMC3/PSMC5/PSMD1/PSMD10/PSMD11/PSMD12/PSMD4/PSMD6/PSMD8/PSME1/UBC	31
	GO:0002220	innate immune response activating cell surface receptor signaling pathway	23/855	116/18670	2.33E-09	1.98E-07	1.81E-07	CUL1/HRAS/PSMA1/PSMA3/PSMA7/PSMA8/PSMB2/PSMB4/PSMB5/PSMB6/PSMB7/PSMC1/PSMC2/PSMC3/PSMC5/PSMD1/PSMD10/PSMD11/PSMD12/PSMD4/PSMD6/PSMD8/PSME1	23
	GO:0048002	antigen processing and presentation of peptide antigen	30/855	189/18670	2.53E-09	2.11E-07	1.93E-07	ACTR10/CLTC/DCTN2/DCTN3/DCTN6/DYNC1H1/DYNLL1/KIF11/KIFAP3/PSMA1/PSMA3/PSMA7/PSMA8/PSMB2/PSMB4/PSMB5/PSMB6/PSMB7/PSMC1/PSMC2/PSMC3/PSMC5/PSMD1/PSMD10/PSMD11/PSMD12/PSMD4/PSMD6/PSMD8/PSME1	30
	GO:0060071	Wnt signaling pathway, planar cell polarity pathway	22/855	108/18670	3.05E-09	2.46E-07	2.25E-07	CLTC/PSMA1/PSMA3/PSMA7/PSMA8/PSMB2/PSMB4/PSMB5/PSMB6/PSMB7/PSMC1/PSMC2/PSMC3/PSMC5/PSMD1/PSMD10/PSMD11/PSMD12/PSMD4/PSMD6/PSMD8/PSME1	22
	GO:1901991	negative regulation of mitotic cell cycle phase transition	35/855	248/18670	3.05E-09	2.46E-07	2.25E-07	CDC20/CDK1/CDKN2D/CNOT10/CUL1/IK/MAD1L1/NAE1/PCID2/PSMA1/PSMA3/PSMA7/PSMA8/PSMB2/PSMB4/PSMB5/PSMB6/PSMB7/PSMC1/PSMC2/PSMC3/PSMC5/PSMD1/PSMD10/PSMD11/PSMD12/PSMD4/PSMD6/PSMD8/PSME1/PSMG2/RBX1/RFWD3/RINT1/RPA2	35
	GO:0042254	ribosome biogenesis	39/855	297/18670	3.16E-09	2.49E-07	2.28E-07	AAMP/ABT1/BYSL/C1QBP/DDX28/EIF6/EMG1/ERI3/EXOSC4/EXOSC5/EXOSC9/IMP3/IMP4/MRPL1/MRPL22/MRPL36/MRPS11/MRPS7/MRPS9/MRTO4/NOB1/NOP10/NSA2/NVL/POP4/POP7/PWP2/RAN/RPF1/RRP36/RRP9/UTP15/UTP18/WDR46/WDR74/XRN2/ZNF593/ZNF622/ZNHIT3	39
	GO:0050852	T cell receptor signaling pathway	31/855	202/18670	3.19E-09	2.49E-07	2.28E-07	BTN2A1/BTN3A3/CD3G/CUL1/EIF2B1/EIF2B3/ERMAP/HRAS/PSMA1/PSMA3/PSMA7/PSMA8/PSMB2/PSMB4/PSMB5/PSMB6/PSMB7/PSMC1/PSMC2/PSMC3/PSMC5/PSMD1/PSMD10/PSMD11/PSMD12/PSMD4/PSMD6/PSMD8/PSME1/STOML2/UBE2N	31
	GO:0043687	post-translational protein modification	44/855	361/18670	3.27E-09	2.51E-07	2.30E-07	ASB2/BMP4/COMMD1/COPS3/COPS4/COPS5/COPS7A/CUL1/CUL3/DCAF17/FBXO17/FBXO4/FEM1C/FOLH1B/GPS1/NAE1/PSMA1/PSMA3/PSMA7/PSMA8/PSMB2/PSMB4/PSMB5/PSMB6/PSMB7/PSMC1/PSMC2/PSMC3/PSMC5/PSMD1/PSMD10/PSMD11/PSMD12/PSMD4/PSMD6/PSMD8/PSME1/RAB11A/RABGGTB/RBX1/SENP8/SPP2/UBE2M/UCHL3	44
	GO:0070646	protein modification by small protein removal	39/855	299/18670	3.83E-09	2.90E-07	2.65E-07	ACTR5/CDC20/CDK1/COPS3/COPS4/COPS5/COPS7A/GPS1/POLB/PSMA1/PSMA3/PSMA7/PSMA8/PSMB2/PSMB4/PSMB5/PSMB6/PSMB7/PSMC1/PSMC2/PSMC3/PSMC5/PSMD1/PSMD10/PSMD11/PSMD12/PSMD4/PSMD6/PSMD8/PSME1/RUVBL1/SENP8/SIAH2/TOMM20/TOR1A/UBC/UCHL3/USP39/USPL1	39
	GO:0090175	regulation of establishment of planar polarity	22/855	110/18670	4.38E-09	3.26E-07	2.98E-07	CLTC/PSMA1/PSMA3/PSMA7/PSMA8/PSMB2/PSMB4/PSMB5/PSMB6/PSMB7/PSMC1/PSMC2/PSMC3/PSMC5/PSMD1/PSMD10/PSMD11/PSMD12/PSMD4/PSMD6/PSMD8/PSME1	22
	GO:0038061	NIK/NF-kappaB signaling	29/855	183/18670	4.84E-09	3.55E-07	3.25E-07	C1QTNF4/CUL1/MAS1/PPP4C/PRDX1/PSMA1/PSMA3/PSMA7/PSMA8/PSMB2/PSMB4/PSMB5/PSMB6/PSMB7/PSMC1/PSMC2/PSMC3/PSMC5/PSMD1/PSMD10/PSMD11/PSMD12/PSMD4/PSMD6/PSMD8/PSME1/RTKN2/TERF2IP/TLR9	29
	GO:0006119	oxidative phosphorylation	25/855	145/18670	9.70E-09	7.00E-07	6.42E-07	CDK1/COX5B/COX6B1/DLD/MSH2/ND6/NDUFA1/NDUFA12/NDUFA2/NDUFA4/NDUFA7/NDUFA8/NDUFAB1/NDUFAF1/NDUFB10/NDUFB4/NDUFB5/NDUFS3/NDUFV2/NDUFV3/PGK1/STOML2/UQCR10/UQCRC2/UQCRFS1	25
	GO:0062012	regulation of small molecule metabolic process	50/855	459/18670	1.25E-08	8.91E-07	8.16E-07	AAAS/ACACA/ARV1/CDK1/CLTC/CLYBL/COQ3/DUSP12/EIF6/EPHX2/GSTZ1/GUCA2B/INSIG2/KHK/MAS1/MTOR/NUP155/NUP50/NUP85/PARP1/PGK1/POR/PPARG/PPP1CA/PRKAG1/PSMA1/PSMA3/PSMA7/PSMA8/PSMB2/PSMB4/PSMB5/PSMB6/PSMB7/PSMC1/PSMC2/PSMC3/PSMC5/PSMD1/PSMD10/PSMD11/PSMD12/PSMD4/PSMD6/PSMD8/PSME1/RAN/SOD1/STAR/TM7SF2	50
	GO:0006520	cellular amino acid metabolic process	43/855	366/18670	1.49E-08	1.04E-06	9.56E-07	AHCY/ASL/BLMH/BPHL/CTPS1/DLD/EEF1E1/ENOSF1/FOLH1B/GOT1/GOT2/GSS/GSTZ1/HMGCLL1/IARS2/MTHFD1/NFS1/NIT2/PPA1/PSMA1/PSMA3/PSMA7/PSMA8/PSMB2/PSMB4/PSMB5/PSMB6/PSMB7/PSMC1/PSMC2/PSMC3/PSMC5/PSMD1/PSMD10/PSMD11/PSMD12/PSMD4/PSMD6/PSMD8/PSME1/RARS2/SDSL/TDO2	43
	GO:0010565	regulation of cellular ketone metabolic process	28/855	181/18670	1.53E-08	1.06E-06	9.70E-07	COQ3/EIF6/GSTZ1/INSIG2/MTOR/PPARG/PSMA1/PSMA3/PSMA7/PSMA8/PSMB2/PSMB4/PSMB5/PSMB6/PSMB7/PSMC1/PSMC2/PSMC3/PSMC5/PSMD1/PSMD10/PSMD11/PSMD12/PSMD4/PSMD6/PSMD8/PSME1/STAR	28
	GO:0043624	cellular protein complex disassembly	31/855	217/18670	1.82E-08	1.24E-06	1.13E-06	CHCHD1/GFM2/MRPL1/MRPL12/MRPL13/MRPL14/MRPL15/MRPL16/MRPL17/MRPL18/MRPL21/MRPL22/MRPL27/MRPL36/MRPL37/MRPL39/MRPL40/MRPL46/MRPL47/MRPS11/MRPS12/MRPS17/MRPS18C/MRPS23/MRPS28/MRPS34/MRPS7/MRPS9/OXA1L/TMOD1/TRIM54	31
	GO:1901988	negative regulation of cell cycle phase transition	35/855	267/18670	2.12E-08	1.43E-06	1.31E-06	CDC20/CDK1/CDKN2D/CNOT10/CUL1/IK/MAD1L1/NAE1/PCID2/PSMA1/PSMA3/PSMA7/PSMA8/PSMB2/PSMB4/PSMB5/PSMB6/PSMB7/PSMC1/PSMC2/PSMC3/PSMC5/PSMD1/PSMD10/PSMD11/PSMD12/PSMD4/PSMD6/PSMD8/PSME1/PSMG2/RBX1/RFWD3/RINT1/RPA2	35
	GO:0001738	morphogenesis of a polarized epithelium	24/855	141/18670	2.48E-08	1.64E-06	1.50E-06	CLTC/DLG3/PAFAH1B1/PSMA1/PSMA3/PSMA7/PSMA8/PSMB2/PSMB4/PSMB5/PSMB6/PSMB7/PSMC1/PSMC2/PSMC3/PSMC5/PSMD1/PSMD10/PSMD11/PSMD12/PSMD4/PSMD6/PSMD8/PSME1	24
	GO:0071453	cellular response to oxygen levels	32/855	234/18670	3.11E-08	2.03E-06	1.86E-06	AIFM1/ANGPT4/ATP6AP1/CHCHD2/CITED2/FAM162A/MTOR/PGK1/PPARG/PSMA1/PSMA3/PSMA7/PSMA8/PSMB2/PSMB4/PSMB5/PSMB6/PSMB7/PSMC1/PSMC2/PSMC3/PSMC5/PSMD1/PSMD10/PSMD11/PSMD12/PSMD4/PSMD6/PSMD8/PSME1/RBX1/UBC	32
	GO:0042180	cellular ketone metabolic process	33/855	248/18670	3.72E-08	2.40E-06	2.20E-06	COQ3/COQ6/EIF6/GLO1/GOT2/GSTZ1/INSIG2/MTOR/OXCT1/PPARG/PSMA1/PSMA3/PSMA7/PSMA8/PSMB2/PSMB4/PSMB5/PSMB6/PSMB7/PSMC1/PSMC2/PSMC3/PSMC5/PSMD1/PSMD10/PSMD11/PSMD12/PSMD4/PSMD6/PSMD8/PSME1/STAR/TDO2	33
	GO:0019882	antigen processing and presentation	31/855	226/18670	4.75E-08	3.02E-06	2.77E-06	ACTR10/CLTC/DCTN2/DCTN3/DCTN6/DYNC1H1/DYNLL1/KIF11/KIFAP3/PSMA1/PSMA3/PSMA7/PSMA8/PSMB2/PSMB4/PSMB5/PSMB6/PSMB7/PSMC1/PSMC2/PSMC3/PSMC5/PSMD1/PSMD10/PSMD11/PSMD12/PSMD4/PSMD6/PSMD8/PSME1/RAB33A	31
	GO:0090263	positive regulation of canonical Wnt signaling pathway	24/855	147/18670	5.67E-08	3.56E-06	3.26E-06	CCAR2/PSMA1/PSMA3/PSMA7/PSMA8/PSMB2/PSMB4/PSMB5/PSMB6/PSMB7/PSMC1/PSMC2/PSMC3/PSMC5/PSMD1/PSMD10/PSMD11/PSMD12/PSMD4/PSMD6/PSMD8/PSME1/RSPO2/RUVBL1	24
	GO:0036294	cellular response to decreased oxygen levels	30/855	217/18670	6.53E-08	4.05E-06	3.71E-06	AIFM1/ANGPT4/CHCHD2/CITED2/FAM162A/MTOR/PGK1/PSMA1/PSMA3/PSMA7/PSMA8/PSMB2/PSMB4/PSMB5/PSMB6/PSMB7/PSMC1/PSMC2/PSMC3/PSMC5/PSMD1/PSMD10/PSMD11/PSMD12/PSMD4/PSMD6/PSMD8/PSME1/RBX1/UBC	30
	GO:0046034	ATP metabolic process	37/855	305/18670	6.62E-08	4.05E-06	3.71E-06	AAAS/ATP6V1B2/BPGM/CDK1/COX5B/COX6B1/DLD/EIF6/ENO2/LDHA/MSH2/ND6/NDUFA1/NDUFA12/NDUFA2/NDUFA4/NDUFA7/NDUFA8/NDUFAB1/NDUFAF1/NDUFB10/NDUFB4/NDUFB5/NDUFS3/NDUFV2/NDUFV3/NUP155/NUP50/NUP85/PARP1/PFKM/PGK1/PRKAG1/STOML2/UQCR10/UQCRC2/UQCRFS1	37
	GO:0071456	cellular response to hypoxia	29/855	207/18670	8.05E-08	4.87E-06	4.46E-06	ANGPT4/CHCHD2/CITED2/FAM162A/MTOR/PGK1/PSMA1/PSMA3/PSMA7/PSMA8/PSMB2/PSMB4/PSMB5/PSMB6/PSMB7/PSMC1/PSMC2/PSMC3/PSMC5/PSMD1/PSMD10/PSMD11/PSMD12/PSMD4/PSMD6/PSMD8/PSME1/RBX1/UBC	29
	GO:0010948	negative regulation of cell cycle process	41/855	361/18670	8.31E-08	4.96E-06	4.55E-06	BMP4/CDC20/CDK1/CDKN2D/CHMP2A/CNOT10/CUL1/HSP90AB1/IK/MAD1L1/NAE1/PCID2/PHOX2B/PSMA1/PSMA3/PSMA7/PSMA8/PSMB2/PSMB4/PSMB5/PSMB6/PSMB7/PSMC1/PSMC2/PSMC3/PSMC5/PSMD1/PSMD10/PSMD11/PSMD12/PSMD4/PSMD6/PSMD8/PSME1/PSMG2/PTTG3P/RBX1/RFWD3/RINT1/RPA2/SETMAR	41
	GO:0044106	cellular amine metabolic process	22/855	129/18670	9.08E-08	5.36E-06	4.91E-06	PSMA1/PSMA3/PSMA7/PSMA8/PSMB2/PSMB4/PSMB5/PSMB6/PSMB7/PSMC1/PSMC2/PSMC3/PSMC5/PSMD1/PSMD10/PSMD11/PSMD12/PSMD4/PSMD6/PSMD8/PSME1/TDO2	22
	GO:0000209	protein polyubiquitination	37/855	310/18670	1.01E-07	5.88E-06	5.38E-06	BLMH/CUL1/CUL3/FBXO17/FBXO4/PSMA1/PSMA3/PSMA7/PSMA8/PSMB2/PSMB4/PSMB5/PSMB6/PSMB7/PSMC1/PSMC2/PSMC3/PSMC5/PSMD1/PSMD10/PSMD11/PSMD12/PSMD4/PSMD6/PSMD8/PSME1/RBX1/RLIM/RNF187/RNF34/RNF8/SIAH2/UBC/UBE2N/UBE2S/UBE2T/UBE2V2	37
	GO:0006401	RNA catabolic process	43/855	397/18670	1.55E-07	8.95E-06	8.20E-06	APEX1/BOLL/CIRBP/CNOT10/DCPS/DIS3L/EXOSC4/EXOSC5/EXOSC9/FEN1/LSM3/METTL3/MRTO4/MTOR/NCBP1/PCID2/PRPF18/PSMA1/PSMA3/PSMA7/PSMA8/PSMB2/PSMB4/PSMB5/PSMB6/PSMB7/PSMC1/PSMC2/PSMC3/PSMC5/PSMD1/PSMD10/PSMD11/PSMD12/PSMD4/PSMD6/PSMD8/PSME1/SLIRP/SUPV3L1/UBC/XRN2/ZPR1	43
	GO:0032984	protein-containing complex disassembly	38/855	329/18670	1.60E-07	9.11E-06	8.35E-06	CHCHD1/CHMP2A/GABARAPL1/GABARAPL2/GFM2/MAP1LC3B/MRPL1/MRPL12/MRPL13/MRPL14/MRPL15/MRPL16/MRPL17/MRPL18/MRPL21/MRPL22/MRPL27/MRPL36/MRPL37/MRPL39/MRPL40/MRPL46/MRPL47/MRPS11/MRPS12/MRPS17/MRPS18C/MRPS23/MRPS28/MRPS34/MRPS7/MRPS9/OXA1L/PPP1CA/SNX14/TMOD1/TRIM54/TSG101	38
	GO:0006364	rRNA processing	29/855	214/18670	1.67E-07	9.39E-06	8.60E-06	ABT1/BYSL/EMG1/ERI3/EXOSC4/EXOSC5/EXOSC9/IMP3/IMP4/MRPL1/MRPS11/MRPS9/MRTO4/NOB1/NOP10/NSA2/NVL/POP4/POP7/PWP2/RPF1/RRP36/RRP9/UTP15/UTP18/WDR46/WDR74/XRN2/ZNHIT3	29
	GO:0009308	amine metabolic process	22/855	138/18670	3.09E-07	1.72E-05	1.57E-05	PSMA1/PSMA3/PSMA7/PSMA8/PSMB2/PSMB4/PSMB5/PSMB6/PSMB7/PSMC1/PSMC2/PSMC3/PSMC5/PSMD1/PSMD10/PSMD11/PSMD12/PSMD4/PSMD6/PSMD8/PSME1/TDO2	22
	GO:0035567	non-canonical Wnt signaling pathway	23/855	150/18670	3.44E-07	1.89E-05	1.73E-05	CALM1/CLTC/PSMA1/PSMA3/PSMA7/PSMA8/PSMB2/PSMB4/PSMB5/PSMB6/PSMB7/PSMC1/PSMC2/PSMC3/PSMC5/PSMD1/PSMD10/PSMD11/PSMD12/PSMD4/PSMD6/PSMD8/PSME1	23
	GO:0000715	nucleotide-excision repair, DNA damage recognition	9/855	23/18670	3.89E-07	2.09E-05	1.91E-05	CETN2/COPS3/COPS4/COPS5/COPS7A/GPS1/PARP1/RBX1/UBC	9
	GO:0010499	proteasomal ubiquitin-independent protein catabolic process	9/855	23/18670	3.89E-07	2.09E-05	1.91E-05	PSMA1/PSMA3/PSMA7/PSMA8/PSMB2/PSMB4/PSMB5/PSMB6/PSMB7	9
	GO:0090305	nucleic acid phosphodiester bond hydrolysis	35/855	302/18670	4.54E-07	2.41E-05	2.21E-05	ABT1/AIFM1/APEX1/DCLRE1A/DCPS/DDX1/DIS3L/ELAC2/ERCC3/ERI3/EXO5/EXOG/EXOSC4/EXOSC5/EXOSC9/FEN1/HARBI1/NCBP1/NOB1/NTHL1/NUDT21/PARP1/PNKP/POLR3K/POP4/POP7/RBX1/RPA2/RPA3/RRP36/SETMAR/TATDN1/TSEN15/UBC/XRN2	35
	GO:0002244	hematopoietic progenitor cell differentiation	24/855	166/18670	5.83E-07	3.07E-05	2.81E-05	BMP4/METTL3/NUDT21/PSMA1/PSMA3/PSMA7/PSMA8/PSMB2/PSMB4/PSMB5/PSMB6/PSMB7/PSMC1/PSMC2/PSMC3/PSMC5/PSMD1/PSMD10/PSMD11/PSMD12/PSMD4/PSMD6/PSMD8/PSME1	24
	GO:0090090	negative regulation of canonical Wnt signaling pathway	25/855	178/18670	5.96E-07	3.10E-05	2.84E-05	CUL3/IGFBP2/PSMA1/PSMA3/PSMA7/PSMA8/PSMB2/PSMB4/PSMB5/PSMB6/PSMB7/PSMC1/PSMC2/PSMC3/PSMC5/PSMD1/PSMD10/PSMD11/PSMD12/PSMD4/PSMD6/PSMD8/PSME1/RBX1/SIAH2	25
	GO:0016072	rRNA metabolic process	31/855	253/18670	6.14E-07	3.16E-05	2.89E-05	ABT1/BYSL/DIS3L/EMG1/ERI3/EXOSC4/EXOSC5/EXOSC9/IMP3/IMP4/MRPL1/MRPS11/MRPS9/MRTO4/MTOR/NOB1/NOP10/NSA2/NVL/POP4/POP7/PWP2/RPF1/RRP36/RRP9/UTP15/UTP18/WDR46/WDR74/XRN2/ZNHIT3	31
	GO:0071347	cellular response to interleukin-1	25/855	179/18670	6.63E-07	3.37E-05	3.09E-05	CUL1/PSMA1/PSMA3/PSMA7/PSMA8/PSMB2/PSMB4/PSMB5/PSMB6/PSMB7/PSMC1/PSMC2/PSMC3/PSMC5/PSMD1/PSMD10/PSMD11/PSMD12/PSMD4/PSMD6/PSMD8/PSME1/RBX1/UBC/UBE2N	25
	GO:0010498	proteasomal protein catabolic process	47/855	477/18670	6.77E-07	3.41E-05	3.13E-05	CCAR2/CDC20/CDK1/COMMD1/CUL1/CUL3/EDEM1/EDEM2/FAF1/FAM122A/FBXO17/FBXO4/GABARAPL2/GET4/HSP90AB1/PSMA1/PSMA3/PSMA7/PSMA8/PSMB2/PSMB4/PSMB5/PSMB6/PSMB7/PSMC1/PSMC2/PSMC3/PSMC5/PSMD1/PSMD10/PSMD11/PSMD12/PSMD4/PSMD6/PSMD8/PSME1/RBX1/RNF187/RNF34/SCO1/SDF2/SDF2L1/SIAH2/TOR1A/UBAC2/UBC/UBE2S	47
	GO:1905330	regulation of morphogenesis of an epithelium	25/855	180/18670	7.37E-07	3.67E-05	3.37E-05	BMP4/CLTC/MAGED1/MTOR/PSMA1/PSMA3/PSMA7/PSMA8/PSMB2/PSMB4/PSMB5/PSMB6/PSMB7/PSMC1/PSMC2/PSMC3/PSMC5/PSMD1/PSMD10/PSMD11/PSMD12/PSMD4/PSMD6/PSMD8/PSME1	25
	GO:0016579	protein deubiquitination	33/855	283/18670	8.37E-07	4.13E-05	3.79E-05	ACTR5/CDC20/CDK1/COPS5/POLB/PSMA1/PSMA3/PSMA7/PSMA8/PSMB2/PSMB4/PSMB5/PSMB6/PSMB7/PSMC1/PSMC2/PSMC3/PSMC5/PSMD1/PSMD10/PSMD11/PSMD12/PSMD4/PSMD6/PSMD8/PSME1/RUVBL1/SENP8/SIAH2/TOMM20/UBC/UCHL3/USP39	33
	GO:0034470	ncRNA processing	40/855	384/18670	1.15E-06	5.62E-05	5.14E-05	ABT1/BYSL/DDX1/DUS4L/ELAC2/ELP4/EMG1/ERI3/EXOSC4/EXOSC5/EXOSC9/IMP3/IMP4/INTS12/METTL3/MRPL1/MRPS11/MRPS9/MRTO4/NOB1/NOP10/NSA2/NVL/POLR3K/POP4/POP7/PWP2/RNF113A/RPF1/RRP36/RRP9/TP53RK/TPRKB/TSEN15/UTP15/UTP18/WDR46/WDR74/XRN2/ZNHIT3	40
	GO:0000338	protein deneddylation	6/855	10/18670	1.63E-06	7.86E-05	7.20E-05	COPS3/COPS4/COPS5/COPS7A/GPS1/TOR1A	6
	GO:0006402	mRNA catabolic process	38/855	364/18670	2.01E-06	9.64E-05	8.83E-05	APEX1/BOLL/CIRBP/CNOT10/DCPS/EXOSC4/EXOSC5/EXOSC9/LSM3/METTL3/MRTO4/MTOR/NCBP1/PCID2/PRPF18/PSMA1/PSMA3/PSMA7/PSMA8/PSMB2/PSMB4/PSMB5/PSMB6/PSMB7/PSMC1/PSMC2/PSMC3/PSMC5/PSMD1/PSMD10/PSMD11/PSMD12/PSMD4/PSMD6/PSMD8/PSME1/SUPV3L1/UBC	38
	GO:0070482	response to oxygen levels	40/855	394/18670	2.19E-06	0.000103999	9.53E-05	ADSL/AHCY/AIFM1/ANGPT4/ATP6AP1/CHCHD2/CITED2/ERCC3/FAM162A/LDHA/MTOR/NF1/PGK1/POLB/PPARG/PSEN2/PSMA1/PSMA3/PSMA7/PSMA8/PSMB2/PSMB4/PSMB5/PSMB6/PSMB7/PSMC1/PSMC2/PSMC3/PSMC5/PSMD1/PSMD10/PSMD11/PSMD12/PSMD4/PSMD6/PSMD8/PSME1/RAMP2/RBX1/UBC	40
	GO:0030177	positive regulation of Wnt signaling pathway	24/855	179/18670	2.31E-06	0.000108588	9.95E-05	CCAR2/PSMA1/PSMA3/PSMA7/PSMA8/PSMB2/PSMB4/PSMB5/PSMB6/PSMB7/PSMC1/PSMC2/PSMC3/PSMC5/PSMD1/PSMD10/PSMD11/PSMD12/PSMD4/PSMD6/PSMD8/PSME1/RSPO2/RUVBL1	24
	GO:1903311	regulation of mRNA metabolic process	35/855	324/18670	2.35E-06	0.000109122	1.00E-04	APEX1/BOLL/C1QBP/CIRBP/EXOSC4/EXOSC5/EXOSC9/METTL3/MTOR/NCBP1/NUDT21/PCID2/PSMA1/PSMA3/PSMA7/PSMA8/PSMB2/PSMB4/PSMB5/PSMB6/PSMB7/PSMC1/PSMC2/PSMC3/PSMC5/PSMD1/PSMD10/PSMD11/PSMD12/PSMD4/PSMD6/PSMD8/PSME1/SRSF12/UBC	35
	GO:0006403	RNA localization	28/855	230/18670	2.42E-06	0.000111361	0.000102003	AAAS/CCT2/CCT4/CCT5/CCT7/CETN2/DDX19B/DDX25/DHX38/EIF6/MRPL18/NCBP1/NOP10/NUP155/NUP50/NUP85/NXT1/PCID2/PRPF18/RAN/RUVBL1/THOC5/TOMM20/U2AF1/U2AF1L4/XPO5/ZNF593/ZNHIT3	28
	GO:0038095	Fc-epsilon receptor signaling pathway	23/855	169/18670	2.89E-06	0.000131805	0.000120729	CALM1/CUL1/PSMA1/PSMA3/PSMA7/PSMA8/PSMB2/PSMB4/PSMB5/PSMB6/PSMB7/PSMC1/PSMC2/PSMC3/PSMC5/PSMD1/PSMD10/PSMD11/PSMD12/PSMD4/PSMD6/PSMD8/PSME1	23
	GO:0006294	nucleotide-excision repair, preincision complex assembly	9/855	29/18670	3.72E-06	0.000167995	0.000153878	CDK7/CETN2/ERCC3/MNAT1/PARP1/RBX1/RPA2/RPA3/UBC	9
	GO:0030178	negative regulation of Wnt signaling pathway	26/855	210/18670	4.02E-06	0.000180031	0.000164902	C12orf43/CUL3/IGFBP2/PSMA1/PSMA3/PSMA7/PSMA8/PSMB2/PSMB4/PSMB5/PSMB6/PSMB7/PSMC1/PSMC2/PSMC3/PSMC5/PSMD1/PSMD10/PSMD11/PSMD12/PSMD4/PSMD6/PSMD8/PSME1/RBX1/SIAH2	26
	GO:0000723	telomere maintenance	22/855	162/18670	4.89E-06	0.000217093	0.00019885	APEX1/CCT2/CCT4/CCT5/CCT7/DCLRE1A/FBXO4/FEN1/HSP90AB1/MAPKAPK5/NOP10/NSMCE2/PARP1/PARP3/PNKP/POLE3/POLE4/RAD51C/RPA2/RPA3/TERF2IP/XRCC6	22
	GO:0000377	RNA splicing, via transesterification reactions with bulged adenosine as nucleophile	38/855	379/18670	5.26E-06	0.000229169	0.000209911	BCAS2/BUD31/C1QBP/CIRBP/DCPS/DDX1/DHX16/DHX35/DHX38/EFTUD2/IK/KDM1A/LSM3/METTL3/NCBP1/NOVA1/NUDT21/PCBP1/PLRG1/PPIH/PPIL1/PPWD1/PQBP1/PRPF18/PRPF4/RNF113A/SNRPB2/SNRPC/SNRPD1/SNRPD3/SNRPF/SRSF12/U2AF1/U2AF1L4/UBL5/USP39/ZMAT2/ZMAT5	38
	GO:0000398	mRNA splicing, via spliceosome	38/855	379/18670	5.26E-06	0.000229169	0.000209911	BCAS2/BUD31/C1QBP/CIRBP/DCPS/DDX1/DHX16/DHX35/DHX38/EFTUD2/IK/KDM1A/LSM3/METTL3/NCBP1/NOVA1/NUDT21/PCBP1/PLRG1/PPIH/PPIL1/PPWD1/PQBP1/PRPF18/PRPF4/RNF113A/SNRPB2/SNRPC/SNRPD1/SNRPD3/SNRPF/SRSF12/U2AF1/U2AF1L4/UBL5/USP39/ZMAT2/ZMAT5	38
	GO:0000375	RNA splicing, via transesterification reactions	38/855	382/18670	6.32E-06	0.000273	0.000250059	BCAS2/BUD31/C1QBP/CIRBP/DCPS/DDX1/DHX16/DHX35/DHX38/EFTUD2/IK/KDM1A/LSM3/METTL3/NCBP1/NOVA1/NUDT21/PCBP1/PLRG1/PPIH/PPIL1/PPWD1/PQBP1/PRPF18/PRPF4/RNF113A/SNRPB2/SNRPC/SNRPD1/SNRPD3/SNRPF/SRSF12/U2AF1/U2AF1L4/UBL5/USP39/ZMAT2/ZMAT5	38
	GO:0036293	response to decreased oxygen levels	37/855	370/18670	7.41E-06	0.000317141	0.00029049	ADSL/AHCY/AIFM1/ANGPT4/CHCHD2/CITED2/ERCC3/FAM162A/LDHA/MTOR/NF1/PGK1/PSEN2/PSMA1/PSMA3/PSMA7/PSMA8/PSMB2/PSMB4/PSMB5/PSMB6/PSMB7/PSMC1/PSMC2/PSMC3/PSMC5/PSMD1/PSMD10/PSMD11/PSMD12/PSMD4/PSMD6/PSMD8/PSME1/RAMP2/RBX1/UBC	37
	GO:0009060	aerobic respiration	15/855	87/18670	8.71E-06	0.000369418	0.000338374	ADSL/COX5B/COX6B1/DLD/FH/IDH3A/IDH3B/MDH1/MDH2/MTFR1L/NDUFA4/OXA1L/SDHB/UQCR10/UQCRC2	15
	GO:0001666	response to hypoxia	36/855	359/18670	9.23E-06	0.000388077	0.000355466	ADSL/AHCY/ANGPT4/CHCHD2/CITED2/ERCC3/FAM162A/LDHA/MTOR/NF1/PGK1/PSEN2/PSMA1/PSMA3/PSMA7/PSMA8/PSMB2/PSMB4/PSMB5/PSMB6/PSMB7/PSMC1/PSMC2/PSMC3/PSMC5/PSMD1/PSMD10/PSMD11/PSMD12/PSMD4/PSMD6/PSMD8/PSME1/RAMP2/RBX1/UBC	36
	GO:0050851	antigen receptor-mediated signaling pathway	33/855	316/18670	9.31E-06	0.000388203	0.000355581	BTN2A1/BTN3A3/CD3G/CUL1/EIF2B1/EIF2B3/ERMAP/HRAS/MEF2C/PSMA1/PSMA3/PSMA7/PSMA8/PSMB2/PSMB4/PSMB5/PSMB6/PSMB7/PSMC1/PSMC2/PSMC3/PSMC5/PSMD1/PSMD10/PSMD11/PSMD12/PSMD4/PSMD6/PSMD8/PSME1/SLC39A10/STOML2/UBE2N	33
	GO:0070555	response to interleukin-1	25/855	207/18670	9.52E-06	0.000393491	0.000360424	CUL1/PSMA1/PSMA3/PSMA7/PSMA8/PSMB2/PSMB4/PSMB5/PSMB6/PSMB7/PSMC1/PSMC2/PSMC3/PSMC5/PSMD1/PSMD10/PSMD11/PSMD12/PSMD4/PSMD6/PSMD8/PSME1/RBX1/UBC/UBE2N	25
	GO:0043161	proteasome-mediated ubiquitin-dependent protein catabolic process	40/855	419/18670	9.76E-06	0.000400094	0.000366472	CCAR2/CDC20/CDK1/COMMD1/CUL1/CUL3/EDEM1/EDEM2/FAF1/FAM122A/FBXO17/FBXO4/HSP90AB1/PSMA1/PSMA3/PSMA7/PSMA8/PSMB2/PSMB4/PSMB5/PSMB6/PSMB7/PSMC1/PSMC2/PSMC3/PSMC5/PSMD1/PSMD10/PSMD11/PSMD12/PSMD4/PSMD6/PSMD8/PSME1/RBX1/RNF187/RNF34/SIAH2/UBC/UBE2S	40
	GO:0008380	RNA splicing	43/855	469/18670	1.25E-05	0.000508321	0.000465604	AHNAK2/BCAS2/BUD31/C1QBP/CCAR2/CIRBP/DCPS/DDX1/DHX16/DHX35/DHX38/EFTUD2/IK/KDM1A/LSM3/METTL3/NCBP1/NOVA1/NUDT21/PCBP1/PLRG1/PPIH/PPIL1/PPWD1/PQBP1/PRPF18/PRPF4/RNF113A/SNRPB2/SNRPC/SNRPD1/SNRPD3/SNRPF/SRSF12/THOC5/TSEN15/U2AF1/U2AF1L4/UBL5/USP39/ZMAT2/ZMAT5/ZPR1	43
	GO:2000027	regulation of animal organ morphogenesis	28/855	253/18670	1.51E-05	0.000606925	0.000555923	BMP10/BMP4/CITED2/CLTC/MAGED1/POR/PSMA1/PSMA3/PSMA7/PSMA8/PSMB2/PSMB4/PSMB5/PSMB6/PSMB7/PSMC1/PSMC2/PSMC3/PSMC5/PSMD1/PSMD10/PSMD11/PSMD12/PSMD4/PSMD6/PSMD8/PSME1/RSPO2	28
	GO:0034404	nucleobase-containing small molecule biosynthetic process	26/855	226/18670	1.52E-05	0.00060922	0.000558025	AAAS/ADK/BPGM/CTPS1/DNPH1/EIF6/ENO2/HINT1/IMPDH2/ITPA/LDHA/NME1/NTHL1/NUDT1/NUDT18/NUDT7/NUDT9/NUP155/NUP50/NUP85/PDE10A/PFKM/PGK1/PRKAG1/SMUG1/UPRT	26
	GO:0017004	cytochrome complex assembly	9/855	34/18670	1.58E-05	0.000627777	0.000575023	COA1/COA3/HCCS/OXA1L/PET100/SCO1/SCO2/TTC19/UQCR10	9
	GO:0038093	Fc receptor signaling pathway	27/855	241/18670	1.71E-05	0.000667187	0.00061112	ARPC1A/CALM1/CD3G/CUL1/ELMO1/HSP90AB1/PSMA1/PSMA3/PSMA7/PSMA8/PSMB2/PSMB4/PSMB5/PSMB6/PSMB7/PSMC1/PSMC2/PSMC3/PSMC5/PSMD1/PSMD10/PSMD11/PSMD12/PSMD4/PSMD6/PSMD8/PSME1	27
	GO:0032200	telomere organization	22/855	175/18670	1.71E-05	0.000667187	0.00061112	APEX1/CCT2/CCT4/CCT5/CCT7/DCLRE1A/FBXO4/FEN1/HSP90AB1/MAPKAPK5/NOP10/NSMCE2/PARP1/PARP3/PNKP/POLE3/POLE4/RAD51C/RPA2/RPA3/TERF2IP/XRCC6	22
	GO:1900180	regulation of protein localization to nucleus	17/855	116/18670	2.10E-05	0.000814473	0.000746029	BMP4/BYSL/CABP1/CCT2/CCT4/CCT5/CCT7/CDK1/CHP1/DMAP1/EFCAB7/FBXO4/NF1/NVL/PARP1/RAN/ZPR1	17
	GO:0090501	RNA phosphodiester bond hydrolysis	20/855	154/18670	2.54E-05	0.000973772	0.000891942	ABT1/APEX1/DCPS/DIS3L/ELAC2/ERI3/EXOG/EXOSC4/EXOSC5/EXOSC9/FEN1/NCBP1/NOB1/NUDT21/POLR3K/POP4/POP7/RRP36/TSEN15/XRN2	20
	GO:0033209	tumor necrosis factor-mediated signaling pathway	21/855	167/18670	2.63E-05	0.001001261	0.000917121	PSMA1/PSMA3/PSMA7/PSMA8/PSMB2/PSMB4/PSMB5/PSMB6/PSMB7/PSMC1/PSMC2/PSMC3/PSMC5/PSMD1/PSMD10/PSMD11/PSMD12/PSMD4/PSMD6/PSMD8/PSME1	21
	GO:0006302	double-strand break repair	27/855	248/18670	2.85E-05	0.001077166	0.000986648	ACTR5/CDCA5/DCLRE1A/DDX1/FEN1/KDM1A/MSH2/NSMCE2/PARP1/PARP2/PARP3/POLB/PPP4C/RAD51C/RAD54B/RFWD3/RMI2/RNF8/RPA2/RPA3/SETMAR/SWI5/TERF2IP/UBE2N/UBE2V2/WDR70/XRCC6	27
	GO:0071826	ribonucleoprotein complex subunit organization	30/855	291/18670	3.00E-05	0.001123219	0.00102883	ABT1/C1QBP/CIRBP/DDX1/DDX28/DYNC1H1/EIF2S2/EIF3D/EIF3H/EIF3K/EIF6/GFM2/HSP90AB1/LSM3/MRPL22/MRPS11/MRPS7/MRTO4/NCBP1/NUDT21/PRPF18/PWP2/RUVBL1/SNRPC/SNRPD1/SNRPD3/SNRPF/SRSF12/USP39/ZNHIT3	30
	GO:0022618	ribonucleoprotein complex assembly	29/855	277/18670	3.04E-05	0.001132734	0.001037545	ABT1/C1QBP/CIRBP/DDX1/DDX28/DYNC1H1/EIF2S2/EIF3D/EIF3H/EIF3K/EIF6/HSP90AB1/LSM3/MRPL22/MRPS11/MRPS7/MRTO4/NCBP1/NUDT21/PRPF18/PWP2/RUVBL1/SNRPC/SNRPD1/SNRPD3/SNRPF/SRSF12/USP39/ZNHIT3	29
	GO:0071025	RNA surveillance	6/855	15/18670	3.18E-05	0.001164439	0.001066586	EXOSC4/EXOSC5/EXOSC9/PCID2/PRPF18/SUPV3L1	6
	GO:1904874	positive regulation of telomerase RNA localization to Cajal body	6/855	15/18670	3.18E-05	0.001164439	0.001066586	CCT2/CCT4/CCT5/CCT7/NOP10/RUVBL1	6
	GO:0006289	nucleotide-excision repair	16/855	109/18670	3.58E-05	0.001301688	0.001192302	CDK7/CETN2/COPS3/COPS4/COPS5/COPS7A/ERCC3/GPS1/MNAT1/NTHL1/PARP1/PNKP/RBX1/RPA2/RPA3/UBC	16
	GO:0031503	protein-containing complex localization	29/855	281/18670	3.96E-05	0.00143116	0.001310894	AAAS/BBS12/CEP72/DDX19B/DDX25/DHX38/DLG3/DNM3/DYNLL1/EIF6/GPHN/HRAS/IFT22/IFT43/KIFAP3/NCBP1/NUP155/NUP50/NUP85/NXT1/PCID2/PRKCZ/RAB11A/RAN/THOC5/TUB/U2AF1/U2AF1L4/ZNF593	29
	GO:0009116	nucleoside metabolic process	17/855	123/18670	4.55E-05	0.00162896	0.001492072	ADK/AHCY/ATIC/CDADC1/CTPS1/DNPH1/GMPR2/GPHN/IMPDH2/MAGI3/MOCS2/NFS1/NME1/NUDT18/PRPS1/RAN/UPRT	17
	GO:0006732	coenzyme metabolic process	37/855	403/18670	4.84E-05	0.001720375	0.001575804	AAAS/ACACA/ACBD6/ACOT13/AHCY/ATIC/BPGM/COQ3/COQ6/DLD/EIF6/ENO2/GGH/GPHN/GSTO1/GSTZ1/LDHA/MAT2B/MDH1/MDH2/MMADHC/MOCS2/MTHFD1/NFS1/NUDT7/NUP155/NUP50/NUP85/PANK4/PCCB/PDZD11/PFKM/PGK1/PPCS/PRKAG1/TALDO1/TDO2	37
	GO:0048863	stem cell differentiation	27/855	257/18670	5.33E-05	0.001880079	0.001722088	BMP4/MEF2C/METTL3/NUDT21/PHOX2B/PSMA1/PSMA3/PSMA7/PSMA8/PSMB2/PSMB4/PSMB5/PSMB6/PSMB7/PSMC1/PSMC2/PSMC3/PSMC5/PSMD1/PSMD10/PSMD11/PSMD12/PSMD4/PSMD6/PSMD8/PSME1/SEMA3A	27
	GO:0060828	regulation of canonical Wnt signaling pathway	29/855	286/18670	5.47E-05	0.001915873	0.001754874	CCAR2/CUL3/IGFBP2/PPP1CA/PSMA1/PSMA3/PSMA7/PSMA8/PSMB2/PSMB4/PSMB5/PSMB6/PSMB7/PSMC1/PSMC2/PSMC3/PSMC5/PSMD1/PSMD10/PSMD11/PSMD12/PSMD4/PSMD6/PSMD8/PSME1/RBX1/RSPO2/RUVBL1/SIAH2	29
	GO:0060249	anatomical structure homeostasis	39/855	437/18670	5.69E-05	0.001978546	0.001812281	ACACA/APEX1/ATP6AP1/BBS12/CCT2/CCT4/CCT5/CCT7/CHMP4B/CUBN/DCLRE1A/DRAM2/FBXO4/FEN1/FH/HSP90AB1/MAPKAPK5/MKKS/NF1/NOP10/NSMCE2/P2RX4/PARP1/PARP3/PFKM/PNKP/POLE3/POLE4/PRDX1/RAD51C/RP1/RPA2/RPA3/SOD1/TERF2IP/TLR9/TUB/UBASH3B/XRCC6	39
	GO:0002218	activation of innate immune response	31/855	319/18670	6.87E-05	0.002372348	0.002172989	C1QBP/CUL1/HRAS/LY96/PIK3R4/PQBP1/PSMA1/PSMA3/PSMA7/PSMA8/PSMB2/PSMB4/PSMB5/PSMB6/PSMB7/PSMC1/PSMC2/PSMC3/PSMC5/PSMD1/PSMD10/PSMD11/PSMD12/PSMD4/PSMD6/PSMD8/PSME1/TLR9/UBC/UBE2N/XRCC6	31
	GO:2000001	regulation of DNA damage checkpoint	6/855	17/18670	7.26E-05	0.002491037	0.002281705	CCAR2/FBXO4/RFWD3/RINT1/RPA2/THOC5	6
	GO:0048193	Golgi vesicle transport	34/855	368/18670	8.55E-05	0.00291335	0.002668528	ACTR10/AP4M1/ARF5/BNIP1/CCDC91/COG1/COG3/COG7/COMMD1/COPE/CUL3/DCTN2/DCTN3/DCTN6/DYNC1H1/DYNLL1/EXOC2/GABARAPL2/KIF11/KIFAP3/MPPE1/NRBP1/OPTN/RAB33A/RABEP1/RINT1/STX18/TRAPPC1/TRAPPC11/TRAPPC6B/USE1/USO1/VAMP7/YKT6	34
	GO:0009166	nucleotide catabolic process	21/855	182/18670	9.38E-05	0.003173538	0.002906852	AAAS/BPGM/DNPH1/EIF6/ENO2/HINT1/ITPA/LDHA/NTHL1/NUDT1/NUDT18/NUDT7/NUDT9/NUP155/NUP50/NUP85/PDE10A/PFKM/PGK1/PRKAG1/SMUG1	21
	GO:0006284	base-excision repair	9/855	42/18670	9.69E-05	0.003250207	0.002977078	APEX1/FEN1/NTHL1/PARP2/POLB/PRMT6/RPA2/RPA3/SMUG1	9
	GO:0071897	DNA biosynthetic process	22/855	196/18670	9.74E-05	0.003250207	0.002977078	CCT2/CCT4/CCT5/CCT7/CDKN2D/FBXO4/HSP90AB1/MAPKAPK5/NOP10/NVL/PARP3/PHB/PNKP/POLB/POLE3/POLE4/PPARG/PPIA/RPA2/RPA3/TERF2IP/UBC	22
	GO:1904872	regulation of telomerase RNA localization to Cajal body	6/855	18/18670	0.000104714	0.003469179	0.003177649	CCT2/CCT4/CCT5/CCT7/NOP10/RUVBL1	6
	GO:0006283	transcription-coupled nucleotide-excision repair	12/855	73/18670	0.000110141	0.00362415	0.003319597	CDK7/COPS3/COPS4/COPS5/COPS7A/ERCC3/GPS1/MNAT1/RBX1/RPA2/RPA3/UBC	12
	GO:0002758	innate immune response-activating signal transduction	29/855	298/18670	0.000113596	0.003712596	0.00340061	C1QBP/CUL1/HRAS/LY96/PIK3R4/PSMA1/PSMA3/PSMA7/PSMA8/PSMB2/PSMB4/PSMB5/PSMB6/PSMB7/PSMC1/PSMC2/PSMC3/PSMC5/PSMD1/PSMD10/PSMD11/PSMD12/PSMD4/PSMD6/PSMD8/PSME1/TLR9/UBC/UBE2N	29
	GO:0045088	regulation of innate immune response	39/855	452/18670	0.00011687	0.003793977	0.003475153	C1QBP/CDC37/CRTAM/CUL1/HRAS/HSP90AB1/JAK1/LY96/METTL3/MICB/PIK3R4/POLR3C/PPARG/PQBP1/PSMA1/PSMA3/PSMA7/PSMA8/PSMB2/PSMB4/PSMB5/PSMB6/PSMB7/PSMC1/PSMC2/PSMC3/PSMC5/PSMD1/PSMD10/PSMD11/PSMD12/PSMD4/PSMD6/PSMD8/PSME1/TLR9/UBC/UBE2N/XRCC6	39
	GO:0017038	protein import	22/855	199/18670	0.000121894	0.003930673	0.003600362	BMP4/CABP1/CHP1/DMAP1/EFCAB7/NF1/NUP155/NUP50/NUP85/NXT1/PDCD5/PEX1/PEX19/PEX7/RAN/ROMO1/SAMM50/TIMM17A/TIMM23B/TIMM50/TOMM20/ZPR1	22
	GO:1901657	glycosyl compound metabolic process	18/855	147/18670	0.000136873	0.004384469	0.004016023	ADK/AHCY/ATIC/CDADC1/CTPS1/DNPH1/FUCA1/GMPR2/GPHN/IMPDH2/MAGI3/MOCS2/NFS1/NME1/NUDT18/PRPS1/RAN/UPRT	18
	GO:0009119	ribonucleoside metabolic process	14/855	98/18670	0.000146008	0.004546835	0.004164745	ADK/AHCY/CDADC1/CTPS1/GMPR2/GPHN/IMPDH2/MAGI3/MOCS2/NFS1/NME1/NUDT18/RAN/UPRT	14
	GO:0090670	RNA localization to Cajal body	6/855	19/18670	0.000147136	0.004546835	0.004164745	CCT2/CCT4/CCT5/CCT7/NOP10/RUVBL1	6
	GO:0090671	telomerase RNA localization to Cajal body	6/855	19/18670	0.000147136	0.004546835	0.004164745	CCT2/CCT4/CCT5/CCT7/NOP10/RUVBL1	6
	GO:0090672	telomerase RNA localization	6/855	19/18670	0.000147136	0.004546835	0.004164745	CCT2/CCT4/CCT5/CCT7/NOP10/RUVBL1	6
	GO:0090685	RNA localization to nucleus	6/855	19/18670	0.000147136	0.004546835	0.004164745	CCT2/CCT4/CCT5/CCT7/NOP10/RUVBL1	6
	GO:0006405	RNA export from nucleus	17/855	135/18670	0.000147582	0.004546835	0.004164745	AAAS/DDX19B/DDX25/DHX38/EIF6/NCBP1/NUP155/NUP50/NUP85/NXT1/PCID2/RAN/THOC5/U2AF1/U2AF1L4/XPO5/ZNF593	17
	GO:1901292	nucleoside phosphate catabolic process	21/855	188/18670	0.000149015	0.004561947	0.004178587	AAAS/BPGM/DNPH1/EIF6/ENO2/HINT1/ITPA/LDHA/NTHL1/NUDT1/NUDT18/NUDT7/NUDT9/NUP155/NUP50/NUP85/PDE10A/PFKM/PGK1/PRKAG1/SMUG1	21
	GO:0045089	positive regulation of innate immune response	34/855	381/18670	0.000166984	0.005079887	0.004653002	C1QBP/CRTAM/CUL1/HRAS/LY96/MICB/PIK3R4/POLR3C/PQBP1/PSMA1/PSMA3/PSMA7/PSMA8/PSMB2/PSMB4/PSMB5/PSMB6/PSMB7/PSMC1/PSMC2/PSMC3/PSMC5/PSMD1/PSMD10/PSMD11/PSMD12/PSMD4/PSMD6/PSMD8/PSME1/TLR9/UBC/UBE2N/XRCC6	34
	GO:0043248	proteasome assembly	5/855	13/18670	0.000188339	0.005623441	0.005150879	PSMD10/PSMD11/PSMD4/PSMG1/PSMG2	5
	GO:0071027	nuclear RNA surveillance	5/855	13/18670	0.000188339	0.005623441	0.005150879	EXOSC4/EXOSC5/EXOSC9/PCID2/PRPF18	5
	GO:0071028	nuclear mRNA surveillance	5/855	13/18670	0.000188339	0.005623441	0.005150879	EXOSC4/EXOSC5/EXOSC9/PCID2/PRPF18	5
	GO:0033617	mitochondrial respiratory chain complex IV assembly	6/855	20/18670	0.000202088	0.005996923	0.005492976	COA1/COA3/OXA1L/PET100/SCO1/SCO2	6
	GO:0071426	ribonucleoprotein complex export from nucleus	16/855	127/18670	0.000227638	0.006713944	0.006149743	AAAS/DDX19B/DDX25/DHX38/EIF6/NCBP1/NUP155/NUP50/NUP85/NXT1/PCID2/RAN/THOC5/U2AF1/U2AF1L4/ZNF593	16
	GO:0007050	cell cycle arrest	24/855	237/18670	0.00023785	0.00697261	0.006386672	CAB39/CDC123/CDK1/CDK7/CDKN2D/CDKN3/CNOT10/DDIAS/DHCR24/E4F1/HRAS/HSP90AB1/IFNW1/LAMTOR2/MAP2K1/MSH2/MTOR/PHOX2B/PPM1G/PRKAG1/RRAGA/RRAGB/SETMAR/TSG101	24
	GO:1901068	guanosine-containing compound metabolic process	9/855	47/18670	0.000241105	0.007025458	0.006435079	GMPR2/GPHN/IMPDH2/MAGI3/MOCS2/NFS1/NME1/NUDT18/RAN	9
	GO:0071166	ribonucleoprotein complex localization	16/855	128/18670	0.000249331	0.007221646	0.006614781	AAAS/DDX19B/DDX25/DHX38/EIF6/NCBP1/NUP155/NUP50/NUP85/NXT1/PCID2/RAN/THOC5/U2AF1/U2AF1L4/ZNF593	16
	GO:0006888	ER to Golgi vesicle-mediated transport	22/855	212/18670	0.000302453	0.008708112	0.007976333	ACTR10/COG1/COG3/COG7/COPE/CUL3/DCTN2/DCTN3/DCTN6/DYNC1H1/DYNLL1/MPPE1/NRBP1/RAB33A/RINT1/STX18/TRAPPC1/TRAPPC11/TRAPPC6B/USO1/VAMP7/YKT6	22
	GO:0042769	DNA damage response, detection of DNA damage	8/855	39/18670	0.000325059	0.009303621	0.008521798	MRPS11/MRPS9/PARP1/PNKP/RBX1/RPA2/RPA3/UBC	8
	GO:2001020	regulation of response to DNA damage stimulus	22/855	214/18670	0.000344935	0.009814419	0.008989672	CCAR2/CDKN2D/DDIAS/EEF1E1/FBXO4/KDM1A/PARP1/PARP3/PPP4C/PSMD10/RFWD3/RINT1/RMI2/RNF8/RPA2/SETMAR/SMYD2/TERF2IP/THOC5/UBE2N/UBE2V2/WDR70	22
	GO:0044282	small molecule catabolic process	37/855	445/18670	0.000357653	0.010116776	0.00926662	ACAT2/AHCY/BLMH/BPGM/CDADC1/CHP1/CYP26B1/DHDH/DLD/ECHDC1/ENO2/ENOSF1/ETFB/GNPDA2/GOT1/GOT2/GSTZ1/HACL1/HMGCLL1/IDNK/KHK/MCAT/MECR/MTOR/NAGK/NUDT1/NUDT18/NUDT7/NUDT9/OXCT1/PCCB/PEX7/PFKM/PGK1/SDSL/SLC27A4/TDO2	37
	GO:0016054	organic acid catabolic process	26/855	275/18670	0.000394443	0.011028438	0.010101671	ACAT2/AHCY/BLMH/CHP1/CYP26B1/DLD/ECHDC1/ENOSF1/ETFB/GNPDA2/GOT1/GOT2/GSTZ1/HACL1/HMGCLL1/IDNK/MCAT/MECR/MTOR/NAGK/NUDT7/PCCB/PEX7/SDSL/SLC27A4/TDO2	26
	GO:0046395	carboxylic acid catabolic process	26/855	275/18670	0.000394443	0.011028438	0.010101671	ACAT2/AHCY/BLMH/CHP1/CYP26B1/DLD/ECHDC1/ENOSF1/ETFB/GNPDA2/GOT1/GOT2/GSTZ1/HACL1/HMGCLL1/IDNK/MCAT/MECR/MTOR/NAGK/NUDT7/PCCB/PEX7/SDSL/SLC27A4/TDO2	26
	GO:0009108	coenzyme biosynthetic process	25/855	261/18670	0.000416777	0.011585923	0.010612309	AAAS/ACACA/ATIC/BPGM/COQ3/COQ6/DLD/EIF6/ENO2/GPHN/GSTZ1/LDHA/MAT2B/MMADHC/MOCS2/MTHFD1/NFS1/NUP155/NUP50/NUP85/PANK4/PFKM/PGK1/PPCS/PRKAG1	25
	GO:0072523	purine-containing compound catabolic process	9/855	51/18670	0.000457031	0.012632334	0.011570785	AHCY/DNPH1/HINT1/ITPA/NUDT1/NUDT18/NUDT7/NUDT9/PDE10A	9
	GO:0046128	purine ribonucleoside metabolic process	11/855	73/18670	0.000460962	0.01266861	0.011604013	ADK/AHCY/GMPR2/GPHN/IMPDH2/MAGI3/MOCS2/NFS1/NME1/NUDT18/RAN	11
	GO:1901976	regulation of cell cycle checkpoint	7/855	32/18670	0.00050776	0.013875894	0.012709844	CCAR2/FBXO4/PCID2/RFWD3/RINT1/RPA2/THOC5	7
	GO:0051188	cofactor biosynthetic process	29/855	326/18670	0.000516157	0.014026137	0.012847461	AAAS/ACACA/ALAS1/ATIC/BPGM/CHAC2/COQ3/COQ6/DLD/EIF6/ENO2/GPHN/GSS/GSTZ1/LDHA/MAT2B/MMADHC/MOCS2/MTHFD1/NFS1/NUP155/NUP50/NUP85/PANK4/PFKM/PGK1/PPCS/PRKAG1/SOD1	29
	GO:1901136	carbohydrate derivative catabolic process	20/855	192/18670	0.000531802	0.014370525	0.013162908	AHCY/CDADC1/CHP1/EDEM1/EDEM2/FBXO17/FUCA1/GNPDA2/HINT1/ITPA/NAGK/NEU1/NTHL1/NUDT1/NUDT18/NUDT7/NUDT9/PDE10A/PSAP/SMUG1	20
	GO:0022406	membrane docking	19/855	178/18670	0.000536522	0.014417528	0.013205962	B9D1/CDK1/CEP192/CEP72/CETN2/CHP1/DCTN2/DCTN3/DYNC1H1/DYNLL1/HAUS1/PAFAH1B1/PSEN2/RAB11A/STX8/UNC13A/USO1/VPS45/YKT6	19
	GO:0050657	nucleic acid transport	20/855	193/18670	0.000568407	0.015106517	0.013837052	AAAS/CETN2/DDX19B/DDX25/DHX38/EIF6/MRPL18/NCBP1/NUP155/NUP50/NUP85/NXT1/PCID2/RAN/THOC5/TOMM20/U2AF1/U2AF1L4/XPO5/ZNF593	20
	GO:0050658	RNA transport	20/855	193/18670	0.000568407	0.015106517	0.013837052	AAAS/CETN2/DDX19B/DDX25/DHX38/EIF6/MRPL18/NCBP1/NUP155/NUP50/NUP85/NXT1/PCID2/RAN/THOC5/TOMM20/U2AF1/U2AF1L4/XPO5/ZNF593	20
	GO:0006611	protein export from nucleus	19/855	179/18670	0.000575119	0.015201378	0.013923942	AAAS/CHP1/DDX19B/DDX25/DHX38/EIF6/NCBP1/NUP155/NUP50/NUP85/NXT1/PCID2/RAN/THOC5/TXN/U2AF1/U2AF1L4/XPO5/ZNF593	19
	GO:0072522	purine-containing compound biosynthetic process	28/855	313/18670	0.000585613	0.015394608	0.014100934	AAAS/ACACA/ADK/ADSL/ATIC/BPGM/COX5B/DLD/EIF6/ENO2/GMPR2/GSTZ1/GUCA2B/IMPDH2/LDHA/MTHFD1/NME1/NUP155/NUP50/NUP85/PANK4/PARP1/PFKM/PGK1/PPCS/PRKAG1/PRPS1/STOML2	28
	GO:0009124	nucleoside monophosphate biosynthetic process	21/855	208/18670	0.000591813	0.015473504	0.0141732	AAAS/ADK/ADSL/ATIC/BPGM/CDADC1/COX5B/EIF6/ENO2/IMPDH2/LDHA/NUP155/NUP50/NUP85/PARP1/PFKM/PGK1/PRKAG1/PRPS1/STOML2/UPRT	21
	GO:0008535	respiratory chain complex IV assembly	6/855	24/18670	0.000599826	0.015598702	0.014287877	COA1/COA3/OXA1L/PET100/SCO1/SCO2	6
	GO:1903706	regulation of hemopoiesis	38/855	475/18670	0.000629645	0.016286583	0.014917952	ATP6AP1/BMP4/CYP26B1/DPY30/EIF6/MEF2C/METTL3/MTOR/NF1/NME1/NUDT21/PCID2/PRKCZ/PRMT6/PSMA1/PSMA3/PSMA7/PSMA8/PSMB2/PSMB4/PSMB5/PSMB6/PSMB7/PSMC1/PSMC2/PSMC3/PSMC5/PSMD1/PSMD10/PSMD11/PSMD12/PSMD4/PSMD6/PSMD8/PSME1/SOD1/TLR9/UBASH3B	38
	GO:0042278	purine nucleoside metabolic process	11/855	76/18670	0.000655072	0.016854166	0.015437839	ADK/AHCY/GMPR2/GPHN/IMPDH2/MAGI3/MOCS2/NFS1/NME1/NUDT18/RAN	11
	GO:0006164	purine nucleotide biosynthetic process	27/855	300/18670	0.000663743	0.016897503	0.015477534	AAAS/ACACA/ADK/ADSL/ATIC/BPGM/COX5B/DLD/EIF6/ENO2/GSTZ1/GUCA2B/IMPDH2/LDHA/MTHFD1/NME1/NUP155/NUP50/NUP85/PANK4/PARP1/PFKM/PGK1/PPCS/PRKAG1/PRPS1/STOML2	27
	GO:0046390	ribose phosphate biosynthetic process	27/855	300/18670	0.000663743	0.016897503	0.015477534	AAAS/ACACA/ADK/ADSL/ATIC/BPGM/COX5B/CTPS1/DLD/EIF6/ENO2/GSTZ1/IMPDH2/LDHA/NME1/NUP155/NUP50/NUP85/PANK4/PARP1/PFKM/PGK1/PPCS/PRKAG1/PRPS1/STOML2/UPRT	27
	GO:0051236	establishment of RNA localization	20/855	196/18670	0.00069162	0.01751501	0.016043149	AAAS/CETN2/DDX19B/DDX25/DHX38/EIF6/MRPL18/NCBP1/NUP155/NUP50/NUP85/NXT1/PCID2/RAN/THOC5/TOMM20/U2AF1/U2AF1L4/XPO5/ZNF593	20
	GO:0071806	protein transmembrane transport	10/855	65/18670	0.000699529	0.017623033	0.016142094	PEX1/PEX7/ROMO1/SEC61A1/SEC61G/SRP54/TIMM17A/TIMM23B/TIMM50/TOMM20	10
	GO:0015931	nucleobase-containing compound transport	23/855	241/18670	0.000732723	0.018017025	0.016502978	AAAS/CETN2/DDX19B/DDX25/DHX38/EIF6/MRPL18/NCBP1/NUP155/NUP50/NUP85/NXT1/PCID2/RAN/SLC25A4/SLC25A5/SLC35B1/THOC5/TOMM20/U2AF1/U2AF1L4/XPO5/ZNF593	23
	GO:0006278	RNA-dependent DNA biosynthetic process	11/855	77/18670	0.00073322	0.018017025	0.016502978	CCT2/CCT4/CCT5/CCT7/FBXO4/HSP90AB1/MAPKAPK5/NOP10/PNKP/PPIA/TERF2IP	11
	GO:1903405	protein localization to nuclear body	4/855	10/18670	0.000734785	0.018017025	0.016502978	CCT2/CCT4/CCT5/CCT7	4
	GO:1904851	positive regulation of establishment of protein localization to telomere	4/855	10/18670	0.000734785	0.018017025	0.016502978	CCT2/CCT4/CCT5/CCT7	4
	GO:1904867	protein localization to Cajal body	4/855	10/18670	0.000734785	0.018017025	0.016502978	CCT2/CCT4/CCT5/CCT7	4
	GO:0009156	ribonucleoside monophosphate biosynthetic process	20/855	197/18670	0.000737517	0.018017025	0.016502978	AAAS/ADK/ADSL/ATIC/BPGM/COX5B/EIF6/ENO2/IMPDH2/LDHA/NUP155/NUP50/NUP85/PARP1/PFKM/PGK1/PRKAG1/PRPS1/STOML2/UPRT	20
	GO:0006099	tricarboxylic acid cycle	7/855	34/18670	0.000749362	0.018123322	0.016600342	DLD/FH/IDH3A/IDH3B/MDH1/MDH2/SDHB	7
	GO:0032212	positive regulation of telomere maintenance via telomerase	7/855	34/18670	0.000749362	0.018123322	0.016600342	CCT2/CCT4/CCT5/CCT7/FBXO4/MAPKAPK5/PNKP	7
	GO:0140056	organelle localization by membrane tethering	18/855	169/18670	0.000762485	0.018318713	0.016779313	B9D1/CDK1/CEP192/CEP72/CETN2/DCTN2/DCTN3/DYNC1H1/DYNLL1/HAUS1/PAFAH1B1/PSEN2/RAB11A/STX8/UNC13A/USO1/VPS45/YKT6	18
	GO:0006195	purine nucleotide catabolic process	8/855	44/18670	0.000765015	0.018318713	0.016779313	DNPH1/HINT1/ITPA/NUDT1/NUDT18/NUDT7/NUDT9/PDE10A	8
	GO:0006457	protein folding	22/855	227/18670	0.000771317	0.018378613	0.01683418	CCT2/CCT4/CCT5/CCT6B/CCT7/CDC37/DNAJA4/DNAJB11/EMC3/EMC4/HSP90AB1/MKKS/PDCD5/PEX19/PFDN1/PPIA/PPIH/PPIL1/PSMC1/SIL1/TOR1A/TTC1	22
	GO:0060070	canonical Wnt signaling pathway	29/855	335/18670	0.000797668	0.018913335	0.017323967	CCAR2/CUL3/IGFBP2/PPP1CA/PSMA1/PSMA3/PSMA7/PSMA8/PSMB2/PSMB4/PSMB5/PSMB6/PSMB7/PSMC1/PSMC2/PSMC3/PSMC5/PSMD1/PSMD10/PSMD11/PSMD12/PSMD4/PSMD6/PSMD8/PSME1/RBX1/RSPO2/RUVBL1/SIAH2	29
	GO:0042274	ribosomal small subunit biogenesis	10/855	67/18670	0.000892542	0.021033738	0.019266184	ABT1/BYSL/EMG1/MRPS11/MRPS7/MRPS9/NOB1/PWP2/RRP36/WDR46	10
	GO:0000462	maturation of SSU-rRNA from tricistronic rRNA transcript (SSU-rRNA, 5.8S rRNA, LSU-rRNA)	7/855	35/18670	0.000900141	0.021033738	0.019266184	ABT1/BYSL/MRPS11/MRPS9/PWP2/RRP36/WDR46	7
	GO:0006101	citrate metabolic process	7/855	35/18670	0.000900141	0.021033738	0.019266184	DLD/FH/IDH3A/IDH3B/MDH1/MDH2/SDHB	7
	GO:0006446	regulation of translational initiation	11/855	79/18670	0.000912833	0.021170476	0.019391431	BOLL/CDC123/DDX1/EIF2B1/EIF3H/EIF3K/METTL3/MTOR/NCBP1/PAIP2/PPP1CA	11
	GO:0009165	nucleotide biosynthetic process	32/855	386/18670	0.000914747	0.021170476	0.019391431	AAAS/ACACA/ADK/ADSL/AK6/ATIC/BPGM/CDADC1/COX5B/CTPS1/DLD/EIF6/ENO2/GSTZ1/GUCA2B/IMPDH2/LDHA/MTHFD1/NME1/NUP155/NUP50/NUP85/PANK4/PARP1/PFKM/PGK1/PNKP/PPCS/PRKAG1/PRPS1/STOML2/UPRT	32
	GO:0065002	intracellular protein transmembrane transport	9/855	56/18670	0.00092799	0.021374699	0.019578492	PEX1/PEX7/ROMO1/SEC61A1/SRP54/TIMM17A/TIMM23B/TIMM50/TOMM20	9
	GO:0034504	protein localization to nucleus	24/855	262/18670	0.001011526	0.023116894	0.021174283	BMP4/BYSL/CABP1/CCT2/CCT4/CCT5/CCT7/CDK1/CHP1/DMAP1/EFCAB7/FBXO4/NF1/NUP155/NUP50/NUP85/NVL/NXT1/PARP1/PLRG1/RAN/TOR1A/TXN/ZPR1	24
	GO:0033045	regulation of sister chromatid segregation	11/855	80/18670	0.001015438	0.023116894	0.021174283	CDC20/CDCA5/CUL3/FEN1/IK/MAD1L1/NSMCE2/PCID2/PSMG2/PTTG3P/RMI2	11
	GO:0009260	ribonucleotide biosynthetic process	26/855	293/18670	0.001017965	0.023116894	0.021174283	AAAS/ACACA/ADK/ADSL/ATIC/BPGM/COX5B/CTPS1/DLD/EIF6/ENO2/GSTZ1/IMPDH2/LDHA/NME1/NUP155/NUP50/NUP85/PANK4/PARP1/PFKM/PGK1/PPCS/PRKAG1/STOML2/UPRT	26
	GO:0030490	maturation of SSU-rRNA	8/855	46/18670	0.001039003	0.02348438	0.021510887	ABT1/BYSL/MRPS11/MRPS9/NOB1/PWP2/RRP36/WDR46	8
	GO:0046434	organophosphate catabolic process	23/855	248/18670	0.001081271	0.024285705	0.022244874	AAAS/BPGM/DNPH1/EIF6/ENO2/ENPP6/HINT1/ITPA/LDHA/NTHL1/NUDT1/NUDT18/NUDT7/NUDT9/NUP155/NUP50/NUP85/PDE10A/PFKM/PGK1/PLA2G4A/PRKAG1/SMUG1	23
	GO:1901293	nucleoside phosphate biosynthetic process	32/855	390/18670	0.001084497	0.024285705	0.022244874	AAAS/ACACA/ADK/ADSL/AK6/ATIC/BPGM/CDADC1/COX5B/CTPS1/DLD/EIF6/ENO2/GSTZ1/GUCA2B/IMPDH2/LDHA/MTHFD1/NME1/NUP155/NUP50/NUP85/PANK4/PARP1/PFKM/PGK1/PNKP/PPCS/PRKAG1/PRPS1/STOML2/UPRT	32
	GO:0033044	regulation of chromosome organization	29/855	342/18670	0.001101698	0.024469607	0.022413322	CCT2/CCT4/CCT5/CCT7/CDC20/CDCA5/CUL3/FBXO4/FEN1/IK/KDM1A/MAD1L1/MAPKAPK5/MNAT1/NSMCE2/PARP1/PAX7/PCID2/PNKP/PRMT6/PSMG2/PTTG3P/RMI2/SETMAR/TAF7/TERF2IP/TET1/UBE2N/WDR70	29
	GO:0007052	mitotic spindle organization	13/855	106/18670	0.001103962	0.024469607	0.022413322	AAAS/BCCIP/CDC20/CEP192/CHMP2A/CHMP4B/CLTC/DCTN2/DYNC1H1/KIF11/PARP3/RAB11A/RAN	13
	GO:0002429	immune response-activating cell surface receptor signaling pathway	37/855	473/18670	0.001108783	0.024469607	0.022413322	ARPC1A/BTN2A1/BTN3A3/CD3G/CUL1/EIF2B1/EIF2B3/ELMO1/ERMAP/HRAS/HSP90AB1/MEF2C/MICB/PSMA1/PSMA3/PSMA7/PSMA8/PSMB2/PSMB4/PSMB5/PSMB6/PSMB7/PSMC1/PSMC2/PSMC3/PSMC5/PSMD1/PSMD10/PSMD11/PSMD12/PSMD4/PSMD6/PSMD8/PSME1/SLC39A10/STOML2/UBE2N	37
	GO:0070203	regulation of establishment of protein localization to telomere	4/855	11/18670	0.001112945	0.024469607	0.022413322	CCT2/CCT4/CCT5/CCT7	4
	GO:0016236	macroautophagy	26/855	295/18670	0.001123399	0.024587687	0.02252148	ATG16L1/ATP6V0B/ATP6V1B2/ATP6V1H/CDC37/CHMP2A/CHMP4B/CHMP6/DYNLL1/GABARAPL1/GABARAPL2/LAMTOR2/MAP1LC3B/MTOR/NPRL2/OPTN/PIK3R4/PRKAG1/RRAGA/RRAGB/SCOC/SNX14/TOMM20/TSG101/VDAC1/VPS25	26
	GO:0006913	nucleocytoplasmic transport	29/855	343/18670	0.001152469	0.025110328	0.023000201	AAAS/BMP4/CABP1/CHP1/DDX19B/DDX25/DHX38/DMAP1/EFCAB7/EIF6/NCBP1/NF1/NUP155/NUP50/NUP85/NXT1/PCID2/PRKAG1/RAN/SNRPD1/SNRPD3/SNRPF/THOC5/TXN/U2AF1/U2AF1L4/XPO5/ZNF593/ZPR1	29
	GO:1904589	regulation of protein import	9/855	58/18670	0.001202327	0.02607917	0.023887626	BMP4/CABP1/CHP1/DMAP1/EFCAB7/NF1/PDCD5/RAN/ZPR1	9
	GO:0010833	telomere maintenance via telomere lengthening	11/855	82/18670	0.001249282	0.026856796	0.024599905	CCT2/CCT4/CCT5/CCT7/FBXO4/HSP90AB1/MAPKAPK5/NOP10/PARP1/PNKP/TERF2IP	11
	GO:0034502	protein localization to chromosome	11/855	82/18670	0.001249282	0.026856796	0.024599905	CCT2/CCT4/CCT5/CCT7/CDCA5/CDK1/IK/MSH2/PARP3/RPA2/TERF2IP	11
	GO:0007004	telomere maintenance via telomerase	10/855	70/18670	0.001262172	0.027001978	0.024732887	CCT2/CCT4/CCT5/CCT7/FBXO4/HSP90AB1/MAPKAPK5/NOP10/PNKP/TERF2IP	10
	GO:0006296	nucleotide-excision repair, DNA incision, 5'-to lesion	7/855	37/18670	0.001272783	0.027001978	0.024732887	ERCC3/NTHL1/PARP1/RBX1/RPA2/RPA3/UBC	7
	GO:1904358	positive regulation of telomere maintenance via telomere lengthening	7/855	37/18670	0.001272783	0.027001978	0.024732887	CCT2/CCT4/CCT5/CCT7/FBXO4/MAPKAPK5/PNKP	7
	GO:0097711	ciliary basal body-plasma membrane docking	12/855	95/18670	0.001306541	0.027597105	0.025278002	B9D1/CDK1/CEP192/CEP72/CETN2/DCTN2/DCTN3/DYNC1H1/DYNLL1/HAUS1/PAFAH1B1/RAB11A	12
	GO:0051169	nuclear transport	29/855	346/18670	0.001317176	0.02770078	0.025372966	AAAS/BMP4/CABP1/CHP1/DDX19B/DDX25/DHX38/DMAP1/EFCAB7/EIF6/NCBP1/NF1/NUP155/NUP50/NUP85/NXT1/PCID2/PRKAG1/RAN/SNRPD1/SNRPD3/SNRPF/THOC5/TXN/U2AF1/U2AF1L4/XPO5/ZNF593/ZPR1	29
	GO:0030150	protein import into mitochondrial matrix	5/855	19/18670	0.001352912	0.028207054	0.025836695	ROMO1/TIMM17A/TIMM23B/TIMM50/TOMM20	5
	GO:0051131	chaperone-mediated protein complex assembly	5/855	19/18670	0.001352912	0.028207054	0.025836695	BBS12/CCT2/HOPX/HSP90AB1/MKKS	5
	GO:0030111	regulation of Wnt signaling pathway	30/855	363/18670	0.001367604	0.028390987	0.026005171	C12orf43/CCAR2/CUL3/IGFBP2/PPP1CA/PSMA1/PSMA3/PSMA7/PSMA8/PSMB2/PSMB4/PSMB5/PSMB6/PSMB7/PSMC1/PSMC2/PSMC3/PSMC5/PSMD1/PSMD10/PSMD11/PSMD12/PSMD4/PSMD6/PSMD8/PSME1/RBX1/RSPO2/RUVBL1/SIAH2	30
	GO:0051972	regulation of telomerase activity	8/855	48/18670	0.001386241	0.028654912	0.026246918	CCT2/CCT4/HSP90AB1/MAPKAPK5/NVL/PARP3/PNKP/PPARG	8
	GO:0051168	nuclear export	19/855	194/18670	0.001514066	0.031163982	0.02854514	AAAS/CHP1/DDX19B/DDX25/DHX38/EIF6/NCBP1/NUP155/NUP50/NUP85/NXT1/PCID2/RAN/THOC5/TXN/U2AF1/U2AF1L4/XPO5/ZNF593	19
	GO:0051095	regulation of helicase activity	4/855	12/18670	0.001609199	0.032567764	0.029830956	IFIT1/MNAT1/MSH2/SSBP1	4
	GO:0070202	regulation of establishment of protein localization to chromosome	4/855	12/18670	0.001609199	0.032567764	0.029830956	CCT2/CCT4/CCT5/CCT7	4
	GO:1904816	positive regulation of protein localization to chromosome, telomeric region	4/855	12/18670	0.001609199	0.032567764	0.029830956	CCT2/CCT4/CCT5/CCT7	4
	GO:1990173	protein localization to nucleoplasm	4/855	12/18670	0.001609199	0.032567764	0.029830956	CCT2/CCT4/CCT5/CCT7	4
	GO:0006406	mRNA export from nucleus	13/855	111/18670	0.001690518	0.033929616	0.031078366	AAAS/DDX19B/DDX25/DHX38/NCBP1/NUP155/NUP50/NUP85/NXT1/PCID2/THOC5/U2AF1/U2AF1L4	13
	GO:0071427	mRNA-containing ribonucleoprotein complex export from nucleus	13/855	111/18670	0.001690518	0.033929616	0.031078366	AAAS/DDX19B/DDX25/DHX38/NCBP1/NUP155/NUP50/NUP85/NXT1/PCID2/THOC5/U2AF1/U2AF1L4	13
	GO:0033683	nucleotide-excision repair, DNA incision	7/855	39/18670	0.001756323	0.034960228	0.032022372	ERCC3/NTHL1/PARP1/RBX1/RPA2/RPA3/UBC	7
	GO:0072350	tricarboxylic acid metabolic process	7/855	39/18670	0.001756323	0.034960228	0.032022372	DLD/FH/IDH3A/IDH3B/MDH1/MDH2/SDHB	7
	GO:0009127	purine nucleoside monophosphate biosynthetic process	18/855	183/18670	0.001896558	0.037443482	0.034296947	AAAS/ADK/ADSL/ATIC/BPGM/COX5B/EIF6/ENO2/IMPDH2/LDHA/NUP155/NUP50/NUP85/PARP1/PFKM/PGK1/PRKAG1/STOML2	18
	GO:0009168	purine ribonucleoside monophosphate biosynthetic process	18/855	183/18670	0.001896558	0.037443482	0.034296947	AAAS/ADK/ADSL/ATIC/BPGM/COX5B/EIF6/ENO2/IMPDH2/LDHA/NUP155/NUP50/NUP85/PARP1/PFKM/PGK1/PRKAG1/STOML2	18
	GO:1900182	positive regulation of protein localization to nucleus	10/855	74/18670	0.001939835	0.038142201	0.034936949	CCT2/CCT4/CCT5/CCT7/CDK1/DMAP1/EFCAB7/PARP1/RAN/ZPR1	10
	GO:0016052	carbohydrate catabolic process	19/855	199/18670	0.00203189	0.039790492	0.036446728	AAAS/BPGM/CALM1/DHDH/EIF6/ENO2/ENOSF1/IDNK/KHK/LDHA/NEU1/NUP155/NUP50/NUP85/PFKM/PGK1/PPP1CA/PRKAG1/PYGB	19
	GO:0036258	multivesicular body assembly	6/855	30/18670	0.002093423	0.040830189	0.037399055	CHMP2A/CHMP4B/CHMP6/RAB11A/TSG101/VPS25	6
	GO:0006353	DNA-templated transcription, termination	10/855	75/18670	0.002148428	0.041567785	0.038074667	CDK7/ERCC3/MNAT1/NCBP1/NUDT21/POLR3K/SNRPD3/SNRPF/TWISTNB/XRN2	10
	GO:0006695	cholesterol biosynthetic process	10/855	75/18670	0.002148428	0.041567785	0.038074667	ACACA/ACAT2/ARV1/DHCR24/INSIG2/NSDHL/POR/RAN/SOD1/TM7SF2	10
	GO:0042255	ribosome assembly	9/855	63/18670	0.002180648	0.041949528	0.03842433	ABT1/C1QBP/DDX28/EIF6/MRPL22/MRPS11/MRPS7/MRTO4/PWP2	9
	GO:0006293	nucleotide-excision repair, preincision complex stabilization	5/855	21/18670	0.002194176	0.041949528	0.03842433	ERCC3/PARP1/RBX1/RPA2/RPA3	5
	GO:0006295	nucleotide-excision repair, DNA incision, 3'-to lesion	5/855	21/18670	0.002194176	0.041949528	0.03842433	ERCC3/PARP1/RBX1/RPA2/RPA3	5
	GO:0006995	cellular response to nitrogen starvation	4/855	13/18670	0.002240692	0.042502855	0.038931159	GABARAPL1/GABARAPL2/MAP1LC3B/NPRL2	4
	GO:0043562	cellular response to nitrogen levels	4/855	13/18670	0.002240692	0.042502855	0.038931159	GABARAPL1/GABARAPL2/MAP1LC3B/NPRL2	4
	GO:0044743	protein transmembrane import into intracellular organelle	7/855	41/18670	0.002371509	0.044550476	0.04080671	PEX1/PEX7/ROMO1/TIMM17A/TIMM23B/TIMM50/TOMM20	7
	GO:1902653	secondary alcohol biosynthetic process	10/855	76/18670	0.002374694	0.044550476	0.04080671	ACACA/ACAT2/ARV1/DHCR24/INSIG2/NSDHL/POR/RAN/SOD1/TM7SF2	10
	GO:0009145	purine nucleoside triphosphate biosynthetic process	17/855	172/18670	0.002376271	0.044550476	0.04080671	AAAS/ADK/BPGM/COX5B/EIF6/ENO2/IMPDH2/LDHA/NME1/NUP155/NUP50/NUP85/PARP1/PFKM/PGK1/PRKAG1/STOML2	17
	GO:0009132	nucleoside diphosphate metabolic process	16/855	158/18670	0.002463829	0.045919563	0.042060746	AAAS/BPGM/EIF6/ENO2/LDHA/MAGI3/NME1/NUDT18/NUDT7/NUDT9/NUP155/NUP50/NUP85/PFKM/PGK1/PRKAG1	16
	GO:0009152	purine ribonucleotide biosynthetic process	24/855	280/18670	0.002469894	0.045919563	0.042060746	AAAS/ACACA/ADK/ADSL/ATIC/BPGM/COX5B/DLD/EIF6/ENO2/GSTZ1/IMPDH2/LDHA/NME1/NUP155/NUP50/NUP85/PANK4/PARP1/PFKM/PGK1/PPCS/PRKAG1/STOML2	24
	GO:0009154	purine ribonucleotide catabolic process	6/855	31/18670	0.002496763	0.045919563	0.042060746	HINT1/ITPA/NUDT18/NUDT7/NUDT9/PDE10A	6
	GO:0009394	2'-deoxyribonucleotide metabolic process	6/855	31/18670	0.002496763	0.045919563	0.042060746	ADK/CDADC1/NTHL1/NUDT1/NUDT18/SMUG1	6
	GO:0036257	multivesicular body organization	6/855	31/18670	0.002496763	0.045919563	0.042060746	CHMP2A/CHMP4B/CHMP6/RAB11A/TSG101/VPS25	6
	GO:0006304	DNA modification	13/855	116/18670	0.002514077	0.046062839	0.042191983	ALKBH3/APEX1/CDADC1/DMAP1/EXOSC4/EXOSC5/MAEL/NTHL1/PARP1/PARP2/PARP3/SMUG1/TET1	13
	GO:0009142	nucleoside triphosphate biosynthetic process	18/855	188/18670	0.002551596	0.046573844	0.042660046	AAAS/ADK/BPGM/COX5B/CTPS1/EIF6/ENO2/IMPDH2/LDHA/NME1/NUP155/NUP50/NUP85/PARP1/PFKM/PGK1/PRKAG1/STOML2	18
	GO:0051983	regulation of chromosome segregation	12/855	103/18670	0.002621966	0.047678373	0.043671756	CDC20/CDCA5/CUL3/DYNC1H1/FEN1/IK/MAD1L1/NSMCE2/PCID2/PSMG2/PTTG3P/RMI2	12
	GO:0036297	interstrand cross-link repair	8/855	53/18670	0.002663254	0.048247787	0.04419332	DCLRE1A/EXO5/RFWD3/RNF8/RPA2/RPA3/UBC/UBE2T	8
	GO:1902850	microtubule cytoskeleton organization involved in mitosis	14/855	131/18670	0.002732798	0.048822351	0.044719601	AAAS/BCCIP/CDC20/CEP192/CHMP2A/CHMP4B/CLTC/DCTN2/DYNC1H1/KIF11/PAFAH1B1/PARP3/RAB11A/RAN	14
	GO:0000469	cleavage involved in rRNA processing	5/855	22/18670	0.002733748	0.048822351	0.044719601	ABT1/ERI3/EXOSC9/NOB1/RRP36	5
	GO:0000717	nucleotide-excision repair, DNA duplex unwinding	5/855	22/18670	0.002733748	0.048822351	0.044719601	CETN2/ERCC3/PARP1/RBX1/UBC	5
	GO:0090503	RNA phosphodiester bond hydrolysis, exonucleolytic	7/855	42/18670	0.002735344	0.048822351	0.044719601	DCPS/DIS3L/ERI3/EXOSC4/EXOSC5/EXOSC9/XRN2	7
CC	GO:0005743	mitochondrial inner membrane	89/888	473/19717	2.30E-31	1.39E-28	1.12E-28	AIFM1/APOO/CABS1/CHCHD1/COA1/COA3/COQ3/COQ6/COX5B/COX6B1/ECSIT/EXOG/GHITM/GOT2/HCCS/IMMT/LETMD1/MPV17/MRPL1/MRPL12/MRPL13/MRPL14/MRPL15/MRPL16/MRPL17/MRPL18/MRPL21/MRPL22/MRPL27/MRPL36/MRPL37/MRPL39/MRPL40/MRPL46/MRPL47/MRPS11/MRPS12/MRPS17/MRPS18C/MRPS23/MRPS28/MRPS34/MRPS7/MRPS9/MTCH2/ND6/NDUFA1/NDUFA12/NDUFA2/NDUFA4/NDUFA7/NDUFA8/NDUFAB1/NDUFAF1/NDUFAF3/NDUFAF5/NDUFB10/NDUFB4/NDUFB5/NDUFS3/NDU…	89
	GO:0098798	mitochondrial protein complex	55/888	262/19717	4.50E-22	1.36E-19	1.10E-19	APOO/CHCHD1/COA3/IMMT/MRPL12/MRPL13/MRPL14/MRPL15/MRPL16/MRPL17/MRPL18/MRPL21/MRPL22/MRPL27/MRPL36/MRPL37/MRPL39/MRPL40/MRPL46/MRPL47/MRPS11/MRPS12/MRPS17/MRPS18C/MRPS28/MRPS34/MRPS7/MRPS9/NDUFA1/NDUFA12/NDUFA2/NDUFA4/NDUFA7/NDUFA8/NDUFAB1/NDUFAF1/NDUFB10/NDUFB4/NDUFB5/NDUFS3/NDUFV2/NDUFV3/PMPCA/ROMO1/SAMM50/SDHB/SUPV3L1/TIMM17A/TIMM23B/TIMM50/TOMM20/UQCR10/UQCRC2/UQCRFS1/VDAC1	55
	GO:0005759	mitochondrial matrix	70/888	469/19717	6.54E-19	1.32E-16	1.06E-16	ALAS1/C1QBP/CCAR2/CDK1/CHCHD1/CLPP/COQ3/DDX28/DLD/ELAC2/ETFB/FASTKD5/FH/GFM2/GOT2/GSTZ1/IARS2/IDH3A/IDH3B/ISCA2/MCAT/MDH2/MECR/MRPL12/MRPL13/MRPL14/MRPL15/MRPL16/MRPL17/MRPL18/MRPL21/MRPL22/MRPL27/MRPL36/MRPL37/MRPL39/MRPL40/MRPL46/MRPL47/MRPS11/MRPS12/MRPS17/MRPS18C/MRPS28/MRPS34/MRPS7/MRPS9/NDUFA7/NDUFAB1/NDUFAF1/NDUFS3/NFS1/NUDT1/NUDT2/NUDT9/OXA1L/OXCT1/PCCB/PMPCA/PRDX3/RARS2/SCO2/SLC25A5/SOD1…	70
	GO:0000313	organellar ribosome	27/888	87/19717	5.31E-16	6.44E-14	5.18E-14	CHCHD1/MRPL12/MRPL13/MRPL14/MRPL15/MRPL16/MRPL17/MRPL18/MRPL21/MRPL22/MRPL27/MRPL36/MRPL37/MRPL39/MRPL40/MRPL46/MRPL47/MRPS11/MRPS12/MRPS17/MRPS18C/MRPS28/MRPS34/MRPS7/MRPS9/NDUFA7/NDUFAB1	27
	GO:0005761	mitochondrial ribosome	27/888	87/19717	5.31E-16	6.44E-14	5.18E-14	CHCHD1/MRPL12/MRPL13/MRPL14/MRPL15/MRPL16/MRPL17/MRPL18/MRPL21/MRPL22/MRPL27/MRPL36/MRPL37/MRPL39/MRPL40/MRPL46/MRPL47/MRPS11/MRPS12/MRPS17/MRPS18C/MRPS28/MRPS34/MRPS7/MRPS9/NDUFA7/NDUFAB1	27
	GO:0044455	mitochondrial membrane part	40/888	229/19717	1.41E-13	1.43E-11	1.15E-11	APOO/COA1/COA3/COQ3/COQ6/IMMT/NDUFA1/NDUFA12/NDUFA2/NDUFA4/NDUFA7/NDUFA8/NDUFAB1/NDUFAF1/NDUFAF5/NDUFB10/NDUFB4/NDUFB5/NDUFS3/NDUFV2/NDUFV3/NOA1/OXA1L/PET100/ROMO1/SAMM50/SCO1/SCO2/SDHB/SLC25A4/STAR/TIMM17A/TIMM23B/TIMM50/TMEM11/TMEM177/TOMM20/UQCR10/UQCRC2/UQCRFS1	40
	GO:0000502	proteasome complex	21/888	63/19717	1.93E-13	1.67E-11	1.34E-11	PSMA1/PSMA3/PSMA7/PSMA8/PSMB2/PSMB4/PSMB5/PSMB6/PSMB7/PSMC1/PSMC2/PSMC3/PSMC5/PSMD1/PSMD10/PSMD11/PSMD12/PSMD4/PSMD6/PSMD8/PSME1	21
	GO:1905369	endopeptidase complex	21/888	64/19717	2.75E-13	2.08E-11	1.67E-11	PSMA1/PSMA3/PSMA7/PSMA8/PSMB2/PSMB4/PSMB5/PSMB6/PSMB7/PSMC1/PSMC2/PSMC3/PSMC5/PSMD1/PSMD10/PSMD11/PSMD12/PSMD4/PSMD6/PSMD8/PSME1	21
	GO:1905368	peptidase complex	23/888	89/19717	5.64E-12	3.80E-10	3.05E-10	PSMA1/PSMA3/PSMA7/PSMA8/PSMB2/PSMB4/PSMB5/PSMB6/PSMB7/PSMC1/PSMC2/PSMC3/PSMC5/PSMD1/PSMD10/PSMD11/PSMD12/PSMD4/PSMD6/PSMD8/PSME1/SPCS1/TADA1	23
	GO:0070469	respiratory chain	23/888	100/19717	7.45E-11	4.52E-09	3.63E-09	COA3/COX6B1/ND6/NDUFA1/NDUFA12/NDUFA2/NDUFA4/NDUFA7/NDUFA8/NDUFAB1/NDUFAF1/NDUFB10/NDUFB4/NDUFB5/NDUFS3/NDUFV2/NDUFV3/OXA1L/SDHB/TTC19/UQCR10/UQCRC2/UQCRFS1	23
	GO:0022624	proteasome accessory complex	12/888	24/19717	1.06E-10	5.85E-09	4.70E-09	PSMC1/PSMC2/PSMC3/PSMC5/PSMD1/PSMD10/PSMD11/PSMD12/PSMD4/PSMD6/PSMD8/PSME1	12
	GO:0000315	organellar large ribosomal subunit	17/888	57/19717	2.83E-10	1.32E-08	1.06E-08	MRPL12/MRPL13/MRPL14/MRPL15/MRPL16/MRPL17/MRPL18/MRPL21/MRPL22/MRPL27/MRPL36/MRPL37/MRPL39/MRPL40/MRPL46/MRPL47/NDUFAB1	17
	GO:0005762	mitochondrial large ribosomal subunit	17/888	57/19717	2.83E-10	1.32E-08	1.06E-08	MRPL12/MRPL13/MRPL14/MRPL15/MRPL16/MRPL17/MRPL18/MRPL21/MRPL22/MRPL27/MRPL36/MRPL37/MRPL39/MRPL40/MRPL46/MRPL47/NDUFAB1	17
	GO:0005838	proteasome regulatory particle	11/888	21/19717	3.39E-10	1.47E-08	1.18E-08	PSMC1/PSMC2/PSMC3/PSMC5/PSMD1/PSMD10/PSMD11/PSMD12/PSMD4/PSMD6/PSMD8	11
	GO:0098803	respiratory chain complex	20/888	85/19717	8.34E-10	3.37E-08	2.71E-08	COA3/COX6B1/NDUFA1/NDUFA12/NDUFA2/NDUFA4/NDUFA7/NDUFA8/NDUFAB1/NDUFAF1/NDUFB10/NDUFB4/NDUFB5/NDUFS3/NDUFV2/NDUFV3/SDHB/UQCR10/UQCRC2/UQCRFS1	20
	GO:0098800	inner mitochondrial membrane protein complex	25/888	135/19717	1.52E-09	5.73E-08	4.61E-08	APOO/COA3/IMMT/NDUFA1/NDUFA12/NDUFA2/NDUFA4/NDUFA7/NDUFA8/NDUFAB1/NDUFAF1/NDUFB10/NDUFB4/NDUFB5/NDUFS3/NDUFV2/NDUFV3/ROMO1/SDHB/TIMM17A/TIMM23B/TIMM50/UQCR10/UQCRC2/UQCRFS1	25
	GO:0005746	mitochondrial respiratory chain	20/888	88/19717	1.61E-09	5.73E-08	4.61E-08	COA3/NDUFA1/NDUFA12/NDUFA2/NDUFA4/NDUFA7/NDUFA8/NDUFAB1/NDUFAF1/NDUFB10/NDUFB4/NDUFB5/NDUFS3/NDUFV2/NDUFV3/OXA1L/SDHB/UQCR10/UQCRC2/UQCRFS1	20
	GO:0005747	mitochondrial respiratory chain complex I	14/888	50/19717	2.63E-08	7.97E-07	6.41E-07	NDUFA1/NDUFA12/NDUFA2/NDUFA4/NDUFA7/NDUFA8/NDUFAB1/NDUFAF1/NDUFB10/NDUFB4/NDUFB5/NDUFS3/NDUFV2/NDUFV3	14
	GO:0030964	NADH dehydrogenase complex	14/888	50/19717	2.63E-08	7.97E-07	6.41E-07	NDUFA1/NDUFA12/NDUFA2/NDUFA4/NDUFA7/NDUFA8/NDUFAB1/NDUFAF1/NDUFB10/NDUFB4/NDUFB5/NDUFS3/NDUFV2/NDUFV3	14
	GO:0045271	respiratory chain complex I	14/888	50/19717	2.63E-08	7.97E-07	6.41E-07	NDUFA1/NDUFA12/NDUFA2/NDUFA4/NDUFA7/NDUFA8/NDUFAB1/NDUFAF1/NDUFB10/NDUFB4/NDUFB5/NDUFS3/NDUFV2/NDUFV3	14
	GO:0030684	preribosome	17/888	76/19717	3.46E-08	9.99E-07	8.04E-07	BYSL/EIF6/EMG1/IMP3/IMP4/MRTO4/NOB1/NSA2/PWP2/RPF1/RRP36/RRP9/UTP18/WDR46/WDR74/ZNF593/ZNF622	17
	GO:0005839	proteasome core complex	9/888	20/19717	7.86E-08	2.16E-06	1.74E-06	PSMA1/PSMA3/PSMA7/PSMA8/PSMB2/PSMB4/PSMB5/PSMB6/PSMB7	9
	GO:0044391	ribosomal subunit	27/888	190/19717	1.21E-07	3.19E-06	2.56E-06	MRPL1/MRPL12/MRPL13/MRPL14/MRPL15/MRPL16/MRPL17/MRPL18/MRPL21/MRPL22/MRPL27/MRPL36/MRPL37/MRPL39/MRPL40/MRPL46/MRPL47/MRPS11/MRPS12/MRPS17/MRPS18C/MRPS28/MRPS34/MRPS7/MRPS9/NDUFAB1/ZNF622	27
	GO:0008540	proteasome regulatory particle, base subcomplex	7/888	12/19717	2.38E-07	6.02E-06	4.84E-06	PSMC1/PSMC2/PSMC3/PSMC5/PSMD1/PSMD10/PSMD4	7
	GO:0005681	spliceosomal complex	26/888	185/19717	2.58E-07	6.25E-06	5.03E-06	BCAS2/BUD31/CIRBP/DHX16/DHX35/DHX38/EFTUD2/IK/LSM3/PLRG1/PPIH/PPIL1/PPWD1/PRPF18/PRPF4/RNF113A/SNRPB2/SNRPC/SNRPD1/SNRPD3/SNRPF/U2AF1/U2AF1L4/USP39/ZMAT2/ZMAT5	26
	GO:0005684	U2-type spliceosomal complex	17/888	90/19717	4.68E-07	1.02E-05	8.19E-06	BCAS2/BUD31/DHX16/EFTUD2/IK/LSM3/PLRG1/PPIL1/PRPF18/PRPF4/RNF113A/SNRPB2/SNRPC/SNRPD1/SNRPD3/SNRPF/ZMAT2	17
	GO:0031304	intrinsic component of mitochondrial inner membrane	12/888	45/19717	4.70E-07	1.02E-05	8.19E-06	APOO/COA1/COA3/IMMT/OXA1L/PET100/SCO1/SCO2/TIMM17A/TIMM23B/TMEM11/TMEM177	12
	GO:0031305	integral component of mitochondrial inner membrane	12/888	45/19717	4.70E-07	1.02E-05	8.19E-06	APOO/COA1/COA3/IMMT/OXA1L/PET100/SCO1/SCO2/TIMM17A/TIMM23B/TMEM11/TMEM177	12
	GO:1990204	oxidoreductase complex	19/888	112/19717	5.77E-07	1.21E-05	9.70E-06	DLD/NDUFA1/NDUFA12/NDUFA2/NDUFA4/NDUFA7/NDUFA8/NDUFAB1/NDUFAF1/NDUFB10/NDUFB4/NDUFB5/NDUFS3/NDUFV2/NDUFV3/SDHB/UQCR10/UQCRC2/UQCRFS1	19
	GO:0005840	ribosome	32/888	272/19717	7.11E-07	1.44E-05	1.16E-05	APEX1/CHCHD1/EIF3H/MRPL1/MRPL12/MRPL13/MRPL14/MRPL15/MRPL16/MRPL17/MRPL18/MRPL21/MRPL22/MRPL27/MRPL36/MRPL37/MRPL39/MRPL40/MRPL46/MRPL47/MRPS11/MRPS12/MRPS17/MRPS18C/MRPS23/MRPS28/MRPS34/MRPS7/MRPS9/NDUFA7/NDUFAB1/ZNF622	32
	GO:0015934	large ribosomal subunit	19/888	121/19717	1.94E-06	3.80E-05	3.06E-05	MRPL1/MRPL12/MRPL13/MRPL14/MRPL15/MRPL16/MRPL17/MRPL18/MRPL21/MRPL22/MRPL27/MRPL36/MRPL37/MRPL39/MRPL40/MRPL46/MRPL47/NDUFAB1/ZNF622	19
	GO:0032592	integral component of mitochondrial membrane	14/888	73/19717	3.95E-06	7.49E-05	6.02E-05	APOO/COA1/COA3/IMMT/OXA1L/PET100/SCO1/SCO2/SLC25A4/TIMM17A/TIMM23B/TMEM11/TMEM177/TOMM20	14
	GO:0071007	U2-type catalytic step 2 spliceosome	9/888	30/19717	4.45E-06	8.18E-05	6.58E-05	BCAS2/BUD31/EFTUD2/PLRG1/PPIL1/SNRPB2/SNRPD1/SNRPD3/SNRPF	9
	GO:0098573	intrinsic component of mitochondrial membrane	14/888	74/19717	4.68E-06	8.34E-05	6.70E-05	APOO/COA1/COA3/IMMT/OXA1L/PET100/SCO1/SCO2/SLC25A4/TIMM17A/TIMM23B/TMEM11/TMEM177/TOMM20	14
	GO:0071005	U2-type precatalytic spliceosome	11/888	50/19717	1.08E-05	0.00018729	0.000150626	DHX16/EFTUD2/IK/LSM3/PRPF4/RNF113A/SNRPB2/SNRPD1/SNRPD3/SNRPF/ZMAT2	11
	GO:0046540	U4/U6 x U5 tri-snRNP complex	10/888	42/19717	1.29E-05	0.00021107	0.00016975	EFTUD2/LSM3/PPIH/PRPF18/PRPF4/SNRPD1/SNRPD3/SNRPF/USP39/ZMAT2	10
	GO:0097526	spliceosomal tri-snRNP complex	10/888	42/19717	1.29E-05	0.00021107	0.00016975	EFTUD2/LSM3/PPIH/PRPF18/PRPF4/SNRPD1/SNRPD3/SNRPF/USP39/ZMAT2	10
	GO:0071011	precatalytic spliceosome	11/888	51/19717	1.32E-05	0.00021107	0.00016975	DHX16/EFTUD2/IK/LSM3/PRPF4/RNF113A/SNRPB2/SNRPD1/SNRPD3/SNRPF/ZMAT2	11
	GO:0000314	organellar small ribosomal subunit	8/888	28/19717	2.28E-05	0.000339553	0.000273082	MRPS11/MRPS12/MRPS17/MRPS18C/MRPS28/MRPS34/MRPS7/MRPS9	8
	GO:0005763	mitochondrial small ribosomal subunit	8/888	28/19717	2.28E-05	0.000339553	0.000273082	MRPS11/MRPS12/MRPS17/MRPS18C/MRPS28/MRPS34/MRPS7/MRPS9	8
	GO:0008180	COP9 signalosome	9/888	36/19717	2.30E-05	0.000339553	0.000273082	COPS3/COPS4/COPS5/COPS7A/DYNLL1/GPS1/HSP90AB1/STOML2/TMOD1	9
	GO:0071013	catalytic step 2 spliceosome	14/888	87/19717	3.22E-05	0.000465045	0.000374007	BCAS2/BUD31/DHX35/DHX38/EFTUD2/LSM3/PLRG1/PPIL1/PPWD1/SNRPB2/SNRPD1/SNRPD3/SNRPF/U2AF1	14
	GO:0101031	chaperone complex	7/888	22/19717	3.45E-05	0.000486705	0.000391427	CCT2/CCT4/CCT5/CCT6B/CCT7/CDC37/HSP90AB1	7
	GO:0030687	preribosome, large subunit precursor	7/888	23/19717	4.77E-05	0.00065725	0.000528586	EIF6/MRTO4/NSA2/RPF1/WDR74/ZNF593/ZNF622	7
	GO:0034774	secretory granule lumen	31/888	321/19717	5.73E-05	0.000771368	0.000620363	ACTR10/CAB39/CCT2/CREG1/DYNC1H1/FUCA1/GGH/GMFG/HP/HSP90AB1/ILF2/IMPDH2/NEU1/NIT2/OSCAR/OSTF1/PPIA/PSMB7/PSMC2/PSMC3/PSMD1/PSMD11/PSMD12/PSMD6/PTGES2/PYGB/SCCPDH/SPP2/STK11IP/TRAPPC1/XRCC6	31
	GO:0000178	exosome (RNase complex)	7/888	24/19717	6.48E-05	0.00083414	0.000670848	DIS3L/EXOSC4/EXOSC5/EXOSC9/NVL/SUPV3L1/WDR74	7
	GO:0000176	nuclear exosome (RNase complex)	6/888	17/19717	6.62E-05	0.00083414	0.000670848	DIS3L/EXOSC4/EXOSC5/EXOSC9/NVL/WDR74	6
	GO:0005832	chaperonin-containing T-complex	5/888	11/19717	6.74E-05	0.00083414	0.000670848	CCT2/CCT4/CCT5/CCT6B/CCT7	5
	GO:0019774	proteasome core complex, beta-subunit complex	5/888	11/19717	6.74E-05	0.00083414	0.000670848	PSMB2/PSMB4/PSMB5/PSMB6/PSMB7	5
	GO:1905354	exoribonuclease complex	7/888	25/19717	8.65E-05	0.001048002	0.000842844	DIS3L/EXOSC4/EXOSC5/EXOSC9/NVL/SUPV3L1/WDR74	7
	GO:1904813	ficolin-1-rich granule lumen	16/888	124/19717	0.000142714	0.001695781	0.001363812	ACTR10/CAB39/GMFG/HSP90AB1/ILF2/IMPDH2/OSTF1/PPIA/PSMB7/PSMC2/PSMC3/PSMD11/PSMD12/PSMD6/TNFAIP6/XRCC6	16
	GO:0060205	cytoplasmic vesicle lumen	31/888	338/19717	0.000148042	0.001725255	0.001387516	ACTR10/CAB39/CCT2/CREG1/DYNC1H1/FUCA1/GGH/GMFG/HP/HSP90AB1/ILF2/IMPDH2/NEU1/NIT2/OSCAR/OSTF1/PPIA/PSMB7/PSMC2/PSMC3/PSMD1/PSMD11/PSMD12/PSMD6/PTGES2/PYGB/SCCPDH/SPP2/STK11IP/TRAPPC1/XRCC6	31
	GO:0031983	vesicle lumen	31/888	339/19717	0.000156116	0.001773179	0.001426058	ACTR10/CAB39/CCT2/CREG1/DYNC1H1/FUCA1/GGH/GMFG/HP/HSP90AB1/ILF2/IMPDH2/NEU1/NIT2/OSCAR/OSTF1/PPIA/PSMB7/PSMC2/PSMC3/PSMD1/PSMD11/PSMD12/PSMD6/PTGES2/PYGB/SCCPDH/SPP2/STK11IP/TRAPPC1/XRCC6	31
	GO:0044452	nucleolar part	20/888	178/19717	0.000158006	0.001773179	0.001426058	ACACA/BTBD10/CHCHD1/DCLRE1A/DEAF1/E2F5/IMP3/IMP4/NFKBIE/NOP10/PLRG1/PWP2/RRP9/SNRPB2/TWISTNB/UBE2N/USO1/UTP15/UTP18/ZNF415	20
	GO:0000177	cytoplasmic exosome (RNase complex)	5/888	14/19717	0.000260978	0.002875504	0.002312591	DIS3L/EXOSC4/EXOSC5/EXOSC9/SUPV3L1	5
	GO:0072546	ER membrane protein complex	4/888	10/19717	0.000690036	0.007408625	0.0059583	EMC3/EMC4/EMC7/EMC9	4
	GO:0099023	tethering complex	10/888	66/19717	0.000696851	0.007408625	0.0059583	AKTIP/COG1/COG3/COG7/EXOC2/RINT1/TRAPPC1/TRAPPC11/VPS39/VPS8	10
	GO:0035861	site of double-strand break	9/888	58/19717	0.001070957	0.011189655	0.008999149	ARPC1A/PARP1/PARP3/RFWD3/RNF8/RPA2/RPA3/SETMAR/WDR70	9
	GO:0005635	nuclear envelope	36/888	464/19717	0.001119322	0.011496765	0.009246139	AAAS/BNIP1/C12orf43/CETN2/CHMP2A/CHMP4B/DDX19B/FAF1/KCNH1/MAD1L1/MAD2L1BP/MGST3/MRPS23/NDUFB4/NUDT1/NUP155/NUP50/NUP85/NXT1/P2RX4/PAFAH1B1/PARP1/PCID2/PLRG1/PRKCZ/PSEN2/QSOX2/RAN/RANBP1/SH3BGRL2/TERF2IP/TM7SF2/TMEM18/TMEM38A/TOR1A/UTP18	36
	GO:0005876	spindle microtubule	9/888	59/19717	0.001214119	0.012198048	0.009810138	CALM1/CDK1/CLTC/CUL3/KIF11/KIFAP3/PAFAH1B1/POLB/RAB11A	9
	GO:0005874	microtubule	33/888	416/19717	0.001227856	0.012198048	0.009810138	BCAS3/BEX4/CALM1/CCT2/CCT4/CCT5/CCT7/CDK1/CLTC/CRHBP/CUL3/DCTN2/DCTN3/DNM3/DYNC1H1/DYNLL1/EML6/GABARAPL1/HAUS1/KIF11/KIF9/KIFAP3/MAP1LC3B/PAFAH1B1/POLB/RAB11A/RADIL/RP1/TRIM54/TTLL1/TUBA1B/TUBA1C/TUBGCP4	33
	GO:0032040	small-subunit processome	7/888	38/19717	0.001362825	0.013320517	0.01071287	EMG1/IMP3/IMP4/PWP2/RRP9/UTP18/WDR46	7
	GO:0005751	mitochondrial respiratory chain complex IV	4/888	12/19717	0.001513035	0.014553954	0.011704848	COA3/NDUFA4/UQCRC2/UQCRFS1	4
	GO:0045277	respiratory chain complex IV	5/888	20/19717	0.001613405	0.015195534	0.012220831	COA3/COX6B1/NDUFA4/UQCRC2/UQCRFS1	5
	GO:0097525	spliceosomal snRNP complex	12/888	99/19717	0.001629884	0.015195534	0.012220831	EFTUD2/LSM3/PPIH/PRPF18/PRPF4/SNRPB2/SNRPC/SNRPD1/SNRPD3/SNRPF/USP39/ZMAT2	12
	GO:0031301	integral component of organelle membrane	20/888	214/19717	0.00167346	0.015365405	0.012357448	APOO/COA1/COA3/IMMT/OXA1L/P2RX4/PET100/QSOX2/SAMD8/SCO1/SCO2/SLC25A4/SLC32A1/SLC35B1/TIMM17A/TIMM23B/TMEM11/TMEM177/TOMM20/VAMP7	20
	GO:0005643	nuclear pore	11/888	89/19717	0.002146603	0.019415539	0.015614721	AAAS/CETN2/DDX19B/MAD1L1/NUP155/NUP50/NUP85/NXT1/PCID2/RAN/RANBP1	11
	GO:0001650	fibrillar center	14/888	132/19717	0.002526314	0.022513919	0.018106556	ACACA/BTBD10/CHCHD1/DCLRE1A/DEAF1/E2F5/IMP4/NFKBIE/PLRG1/SNRPB2/UBE2N/USO1/UTP15/ZNF415	14
	GO:0035578	azurophil granule lumen	11/888	91/19717	0.002565065	0.022527958	0.018117847	ACTR10/CCT2/CREG1/DYNC1H1/FUCA1/GGH/PSMD1/PTGES2/PYGB/STK11IP/TRAPPC1	11
	GO:0030532	small nuclear ribonucleoprotein complex	12/888	105/19717	0.002693708	0.023319813	0.018754687	EFTUD2/LSM3/PPIH/PRPF18/PRPF4/SNRPB2/SNRPC/SNRPD1/SNRPD3/SNRPF/USP39/ZMAT2	12
	GO:0005744	TIM23 mitochondrial import inner membrane translocase complex	4/888	14/19717	0.002846899	0.023450213	0.01885956	ROMO1/TIMM17A/TIMM23B/TIMM50	4
	GO:0031314	extrinsic component of mitochondrial inner membrane	4/888	14/19717	0.002846899	0.023450213	0.01885956	COQ3/COQ6/NDUFAF5/NOA1	4
	GO:0009295	nucleoid	7/888	43/19717	0.002863557	0.023450213	0.01885956	DDX28/ELAC2/FASTKD5/SLC25A5/SSBP1/SUPV3L1/VDAC1	7
	GO:0042645	mitochondrial nucleoid	7/888	43/19717	0.002863557	0.023450213	0.01885956	DDX28/ELAC2/FASTKD5/SLC25A5/SSBP1/SUPV3L1/VDAC1	7
	GO:0070069	cytochrome complex	6/888	34/19717	0.003741531	0.029861804	0.024016007	COA3/COX6B1/NDUFA4/UQCR10/UQCRC2/UQCRFS1	6
	GO:0005662	DNA replication factor A complex	4/888	15/19717	0.003745045	0.029861804	0.024016007	BCAS2/PLRG1/RPA2/RPA3	4
	GO:0000784	nuclear chromosome, telomeric region	13/888	125/19717	0.004193831	0.033005991	0.026544683	APEX1/CDK1/DCLRE1A/FEN1/KDM1A/MSH2/ORC4/PARP1/PPP1CA/RPA2/TERF2IP/THOC5/XRCC6	13
	GO:0101002	ficolin-1-rich granule	17/888	185/19717	0.004270895	0.033181566	0.026685887	ACTR10/CAB39/DYNLL1/GMFG/HSP90AB1/ILF2/IMPDH2/OSTF1/PPIA/PSMB7/PSMC2/PSMC3/PSMD11/PSMD12/PSMD6/TNFAIP6/XRCC6	17
	GO:0005852	eukaryotic translation initiation factor 3 complex	4/888	16/19717	0.004817354	0.036953371	0.029719317	COPS5/EIF3D/EIF3H/EIF3K	4
	GO:0018995	host	9/888	73/19717	0.005367439	0.039351192	0.031647736	AAAS/IFIT1/NUP155/NUP50/NUP85/RAN/SCO1/TSG101/UBC	9
	GO:0043657	host cell	9/888	73/19717	0.005367439	0.039351192	0.031647736	AAAS/IFIT1/NUP155/NUP50/NUP85/RAN/SCO1/TSG101/UBC	9
	GO:0090734	site of DNA damage	9/888	73/19717	0.005367439	0.039351192	0.031647736	ARPC1A/PARP1/PARP3/RFWD3/RNF8/RPA2/RPA3/SETMAR/WDR70	9
	GO:0031300	intrinsic component of organelle membrane	20/888	237/19717	0.005389685	0.039351192	0.031647736	APOO/COA1/COA3/IMMT/OXA1L/P2RX4/PET100/QSOX2/SAMD8/SCO1/SCO2/SLC25A4/SLC32A1/SLC35B1/TIMM17A/TIMM23B/TMEM11/TMEM177/TOMM20/VAMP7	20
	GO:0036452	ESCRT complex	5/888	26/19717	0.005473631	0.039488339	0.031758035	CHMP2A/CHMP4B/CHMP6/TSG101/VPS25	5
	GO:0120114	Sm-like protein family complex	12/888	116/19717	0.00606869	0.04326619	0.034796328	EFTUD2/LSM3/PPIH/PRPF18/PRPF4/SNRPB2/SNRPC/SNRPD1/SNRPD3/SNRPF/USP39/ZMAT2	12
	GO:0000781	chromosome, telomeric region	15/888	161/19717	0.006191928	0.043631495	0.03509012	APEX1/CDK1/DCLRE1A/FEN1/KDM1A/MSH2/NSMCE2/ORC4/PARP1/PPP1CA/RNF8/RPA2/TERF2IP/THOC5/XRCC6	15
	GO:0005774	vacuolar membrane	30/888	412/19717	0.006862947	0.047803974	0.038445787	ACP2/ATG16L1/ATP6V0B/ATP6V1B2/ATP6V1H/CLTC/CUBN/DEPDC5/DRAM2/GABARAPL1/GABARAPL2/GLIPR1/HSP90AB1/LAMTOR2/MAP1LC3B/MTOR/NEU1/NPRL2/P2RX4/PSAP/RRAGA/RRAGB/SNX14/STK11IP/STX8/TLR9/TMEM138/TMEM59/VAMP7/VPS39	30
MF	GO:0016651	oxidoreductase activity, acting on NAD(P)H	24/864	107/17697	2.58E-10	2.16E-07	2.00E-07	AIFM1/CBR1/DHDH/DLD/ECSIT/GMPR2/ND6/NDUFA1/NDUFA12/NDUFA2/NDUFA4/NDUFA7/NDUFA8/NDUFAB1/NDUFB10/NDUFB4/NDUFB5/NDUFS3/NDUFV2/NDUFV3/PGK1/POR/PRDX3/TXN	24
	GO:0003954	NADH dehydrogenase activity	14/864	46/17697	2.19E-08	4.58E-06	4.24E-06	ND6/NDUFA1/NDUFA12/NDUFA2/NDUFA4/NDUFA7/NDUFA8/NDUFAB1/NDUFB10/NDUFB4/NDUFB5/NDUFS3/NDUFV2/NDUFV3	14
	GO:0008137	NADH dehydrogenase (ubiquinone) activity	14/864	46/17697	2.19E-08	4.58E-06	4.24E-06	ND6/NDUFA1/NDUFA12/NDUFA2/NDUFA4/NDUFA7/NDUFA8/NDUFAB1/NDUFB10/NDUFB4/NDUFB5/NDUFS3/NDUFV2/NDUFV3	14
	GO:0050136	NADH dehydrogenase (quinone) activity	14/864	46/17697	2.19E-08	4.58E-06	4.24E-06	ND6/NDUFA1/NDUFA12/NDUFA2/NDUFA4/NDUFA7/NDUFA8/NDUFAB1/NDUFB10/NDUFB4/NDUFB5/NDUFS3/NDUFV2/NDUFV3	14
	GO:0016655	oxidoreductase activity, acting on NAD(P)H, quinone or similar compound as acceptor	15/864	60/17697	1.28E-07	2.14E-05	1.98E-05	CBR1/ND6/NDUFA1/NDUFA12/NDUFA2/NDUFA4/NDUFA7/NDUFA8/NDUFAB1/NDUFB10/NDUFB4/NDUFB5/NDUFS3/NDUFV2/NDUFV3	15
	GO:0004298	threonine-type endopeptidase activity	9/864	21/17697	2.61E-07	3.12E-05	2.89E-05	PSMA1/PSMA3/PSMA7/PSMA8/PSMB2/PSMB4/PSMB5/PSMB6/PSMB7	9
	GO:0070003	threonine-type peptidase activity	9/864	21/17697	2.61E-07	3.12E-05	2.89E-05	PSMA1/PSMA3/PSMA7/PSMA8/PSMB2/PSMB4/PSMB5/PSMB6/PSMB7	9
	GO:0051082	unfolded protein binding	21/864	131/17697	1.45E-06	0.000151097	0.000139834	AAMP/CCT2/CCT4/CCT5/CCT6B/CCT7/CDC37/DNAJA4/DNAJB11/HSP90AB1/MKKS/NDUFAF1/PET100/PFDN1/PPIA/PPIH/SIL1/SRSF12/TOMM20/TOR1A/TTC1	21
	GO:0043021	ribonucleoprotein complex binding	20/864	133/17697	6.99E-06	0.000648981	0.000600606	C1QBP/EIF3K/EIF6/LETMD1/MTOR/NME1/NVL/OXA1L/PPIH/PPP1CA/PQBP1/SEC61A1/SNRPB2/SNRPC/SNRPD1/SNRPD3/SRP54/TIMM50/XPO5/ZNF593	20
	GO:0004518	nuclease activity	25/864	205/17697	2.35E-05	0.001961175	0.001814988	APEX1/DCLRE1A/DCPS/DDX1/DIS3L/ELAC2/ERI3/EXO5/EXOG/EXOSC4/EXOSC5/EXOSC9/FEN1/HARBI1/NME1/NOB1/NTHL1/PNKP/POP4/POP7/RAD51C/SETMAR/TATDN1/TSEN15/XRN2	25
	GO:0140098	catalytic activity, acting on RNA	38/864	386/17697	3.28E-05	0.002362673	0.002186559	ALKBH3/APEX1/DCPS/DDX1/DDX19B/DDX25/DDX28/DHX16/DHX35/DHX38/DIS3L/DTD1/DUS4L/ELAC2/EMG1/ERI3/EXOG/EXOSC4/EXOSC5/EXOSC9/FEN1/IARS2/METTL3/NOB1/POLR3C/POLR3K/POP4/POP7/PRORSD1P/PRPF18/PTRH1/PTRH2/RAD54B/RARS2/SUPV3L1/TSEN15/TWISTNB/XRN2	38
	GO:0004527	exonuclease activity	14/864	81/17697	3.39E-05	0.002362673	0.002186559	APEX1/DCLRE1A/DCPS/DDX1/DIS3L/ERI3/EXO5/EXOG/EXOSC4/EXOSC5/EXOSC9/FEN1/TATDN1/XRN2	14
	GO:0009055	electron transfer activity	17/864	114/17697	3.74E-05	0.002406262	0.002226898	CIAPIN1/COX5B/COX6B1/DHDH/DLD/ETFB/IDH3B/NDUFA12/NDUFA4/NDUFS3/NDUFV2/POR/PTGES2/SDHB/SH3BGRL3/UQCR10/UQCRFS1	17
	GO:0019843	rRNA binding	12/864	63/17697	4.54E-05	0.002710161	0.002508144	CIRBP/DDX28/EMG1/FASTKD5/IMP3/MRPL16/MRPL18/MRPS11/MRPS17/MRPS18C/MRPS7/RPF1	12
	GO:0003735	structural constituent of ribosome	24/864	202/17697	5.19E-05	0.002892446	0.002676841	MRPL1/MRPL12/MRPL13/MRPL14/MRPL15/MRPL16/MRPL17/MRPL18/MRPL21/MRPL22/MRPL27/MRPL36/MRPL37/MRPL46/MRPL47/MRPS11/MRPS12/MRPS17/MRPS18C/MRPS23/MRPS34/MRPS7/MRPS9/NDUFA7	24
	GO:0016796	exonuclease activity, active with either ribo- or deoxyribonucleic acids and producing 5'-phosphomonoesters	11/864	57/17697	8.27E-05	0.004319337	0.003997372	APEX1/DCLRE1A/DIS3L/ERI3/EXO5/EXOSC4/EXOSC5/EXOSC9/FEN1/TATDN1/XRN2	11
	GO:0030515	snoRNA binding	7/864	26/17697	0.00018757	0.009224024	0.008536461	BYSL/IMP3/IMP4/NOP10/NUDT1/NUDT7/RRP9	7
	GO:0004540	ribonuclease activity	15/864	114/17697	0.000430575	0.019997807	0.018507162	APEX1/DCPS/DIS3L/ELAC2/ERI3/EXOG/EXOSC4/EXOSC5/EXOSC9/FEN1/NOB1/POP4/POP7/TSEN15/XRN2	15
	GO:0008565	protein transporter activity	6/864	22/17697	0.000506155	0.021157283	0.01958021	OXA1L/SEC61A1/SEC61G/TIMM17A/TIMM23B/TOMM20	6
	GO:0051537	2 iron, 2 sulfur cluster binding	6/864	22/17697	0.000506155	0.021157283	0.01958021	CIAPIN1/ISCA2/NDUFV2/RFESD/SDHB/UQCRFS1	6
	GO:0140097	catalytic activity, acting on DNA	22/864	213/17697	0.000758644	0.030201241	0.027950028	ACTR5/ALKBH3/APEX1/DCLRE1A/DDX1/ERCC3/EXO5/EXOG/FEN1/NME1/NTHL1/POLB/POLE3/POLE4/RAD51C/RAD54B/RUVBL1/SETMAR/SMUG1/SUPV3L1/TATDN1/XRCC6	22
	GO:0016829	lyase activity	20/864	187/17697	0.000838441	0.030923365	0.028618325	ADSL/APEX1/ASL/CHAC2/CLYBL/ECHDC1/ENO2/ENOSF1/FH/GLO1/GOT1/HACL1/HCCS/HMGCLL1/MGST3/NTHL1/POLB/PTGES2/SDSL/XRCC6	20
	GO:0051536	iron-sulfur cluster binding	10/864	63/17697	0.000887752	0.030923365	0.028618325	CIAPIN1/EXO5/ISCA2/NDUFV2/NFS1/NFU1/NTHL1/RFESD/SDHB/UQCRFS1	10
	GO:0051540	metal cluster binding	10/864	63/17697	0.000887752	0.030923365	0.028618325	CIAPIN1/EXO5/ISCA2/NDUFV2/NFS1/NFU1/NTHL1/RFESD/SDHB/UQCRFS1	10
	GO:0031625	ubiquitin protein ligase binding	27/864	290/17697	0.001024727	0.032816363	0.030370217	CCT2/CUL1/CUL3/DLG3/FAF1/GABARAPL1/GABARAPL2/HSP90AB1/JAK1/MAP1LC3B/NAE1/PACRG/PSMA3/PSMD1/RBX1/RNF34/RNF8/RPA2/RRAGA/SLC25A5/STX8/TSG101/TUBA1B/UBASH3B/UBC/UBE2N/UBE2T	27
	GO:0008409	5'-3' exonuclease activity	5/864	17/17697	0.001037584	0.032816363	0.030370217	DCLRE1A/EXO5/EXOG/FEN1/XRN2	5
	GO:0004529	exodeoxyribonuclease activity	6/864	25/17697	0.001059859	0.032816363	0.030370217	APEX1/DCLRE1A/EXO5/EXOG/FEN1/TATDN1	6
	GO:0003684	damaged DNA binding	10/864	65/17697	0.001138959	0.034006051	0.031471226	APEX1/DCLRE1A/ERCC3/FEN1/MSH2/PNKP/POLB/RPA2/RPA3/XRCC6	10
	GO:0008408	3'-5' exonuclease activity	9/864	55/17697	0.0012718	0.036662932	0.033930062	APEX1/DIS3L/ERI3/EXO5/EXOSC4/EXOSC5/EXOSC9/TATDN1/XRN2	9
